# Supplementary material for: Multidecadal Arctic sea ice thickness and volume derived from iceage
Source: Copernicus journal article supplement (doi:10.5194/tc-2019-192), 2019-08-26
Supplement: Supplementary file [file tc-2019-192-AC4-supplement.pdf]

# Multidecadal Arctic sea ice thickness and volume derived from ice age

Yinghui Liu<sup>1</sup>, Jeffrey R. Key<sup>1</sup>, Xuanji Wang<sup>2</sup>, and Mark Tschudi<sup>3</sup>

<sup>1</sup>Center for Satellite Applications and Research, NOAA/NESDIS, Madison, Wisconsin

<sup>2</sup>Cooperative Institute of Meteorological Satellite Studies, University of Wisconsin, Madison, WI

<sup>3</sup>Colorado Center for Astrodynamics Research, University of Colorado, Boulder, CO

Correspondence to: Yinghui Liu (Yinghui.Liu@noaa.gov)

**Abstract.** Arctic sea ice is a key component of the Arctic climate system, which in turn impacts global climate. Ice concentration, thickness, and volume are among the most important Arctic sea ice parameters. This study presents a new record of Arctic sea ice thickness and volume from 1984 to 2018 based on an existing satellite-derived ice age product. The relationship between ice age and ice thickness is first established for every month based on collocated ice age and ice thickness from submarine sonar data (1984-2000), ICESat (2003-2008), and an empirical ice growth model. Based on this relationship, ice thickness is derived for the entire time period from the weekly ice age product, and the Arctic monthly sea ice volume is then calculated. The ice age-based thickness and volume show good agreement in terms of bias and root-mean-square error with submarine, ICESat, and CryoSat-2 ice thickness, as well as ICESat and CryoSat-2 ice volume, in February/March and October/November from published work. More detailed comparisons with the monthly mean ice thickness from Envisat 2003 to 2010, and CryoSat-2 from CPOM, AWI, and NASA GSFC 2011 to 2018 show low bias in ice age-based thickness due to the underestimation over the area north of the Canadian Arctic Archipelago and Greenland. The ratios of the ice volume uncertainties to the means are estimated ranging from 21% to 29% over the period 1984 to 2018. The ice age-based sea ice volume exhibits a decreasing trend of  $-411 \text{ km}^3/\text{year}$  from 1984 to 2018, stronger than the trends from other datasets. Of the factors affecting the sea ice volume trends, changes in sea ice thickness from November to May contribute at least 80%, decreasing to around 50% in August and September. Changes in sea ice area contribute less than 30% in all months.

## 1 Introduction

Sea ice plays a key role in regulating the energy and mass exchange between the atmosphere and the underlying ocean in the polar regions. Over the last few decades Arctic sea ice extent, area, thickness, and volume have declined significantly (Stroeve et al. 2012, Kwok 2019). The corresponding decrease in surface albedo and changes in cloud properties have led to additional surface radiation absorption, which results in further sea ice reduction (Letterly et al. 2018, Perovich et al. 2007, Pistone et al. 2014). The anomalous sea ice area export out of the Arctic Ocean (Smedstrud et al. 2011) may have an influence on the summer sea ice variability, and the decline of Arctic sea ice may affect the strength of the Atlantic Meridional Overturning Circulation, and thus global climate (Sévellec et al. 2017). Arctic sea ice volume is likely a more sensitive climate

- Style Definition: Normal: Indent: First line: 0.3"
- Style Definition: Heading 1: Indent: First line: 0"
- Style Definition: Heading 2: Indent: First line: 0"
- Style Definition: Heading 3: Indent: First line: 0"
- Style Definition: MS title: Indent: First line: 0"
- Style Definition: Affiliation: Indent: First line: 0"
- Style Definition: Caption: Font: Not Bold, Indent: First line: 0"
- Style Definition: Correspondence: Indent: First line: 0"
- Style Definition: Reference: Indent: Left: 0", Hanging: 0.3"
- Formatted: Indent: First line: 0"

- Deleted: the Ice, Cloud, and land Elevation Satellite (
- Deleted: ,
- Deleted:
- Deleted:
- Deleted:
- Deleted: and CryoSat-2
- Deleted: and CryoSat-2
- Deleted: S

- Deleted: s
- Deleted: accompanying
- Deleted: decreases
- Deleted: y changes lead
- Deleted: s
- Deleted: s
- Deleted: ,

change index than ice extent and area in that the reduction in Arctic sea ice volume is as much as two times that of sea ice extent on a percentage basis in global climate model simulations (Gregory et al. 2002, Solomon et al. 2007). Thus, monitoring Arctic sea ice extent, area, thickness, and volume is becoming increasingly important in understanding the Arctic and global climate systems and their changes, and improving climate forecasting.

50 Using satellites to estimate sea ice properties is advantageous because of the much higher spatial and temporal coverage in the polar regions compared to in situ observations. Uncertainty in satellite-derived Arctic sea ice extent and area is low overall due to the high quality of sea ice concentration retrievals from passive microwave satellite data. Available since the late 1970s, multiple passive microwave sea ice concentration products have provided valuable information for studying trends in sea ice extent and area in the polar regions (Ivanova et al. 2015). Sea ice concentration from satellite sensors in the visible and infrared spectrum have the potential to provide additional information owing to their higher spatial resolution (Liu et al. 55 2016).

Sea ice thickness products have been generated with the space-based lidar altimeter on the Ice, Cloud, and land Elevation Satellite (ICESat) and with radar altimeters onboard Envisat and CryoSat-2 (Connor et al. 2009, Kwok et al. 2009, Laxon et al. 2013), from passive visible and infrared radiometers using the One-dimensional Thermodynamic Ice Model (OTIM) (Wang 60 et al. 2010), from the Soil Moisture and Ocean Salinity (SMOS) satellite, and from other passive microwave radiometers (Tian-Kunze et al. 2014). Sea ice thickness products from ICESat-2, launched in September 2018, will soon be available (Kwok et al. 2016, Markus et al. 2017). Sea ice thickness products from lidar and radar altimeters and SMOS cover from the early and late 2000s respectively, while OTIM ice thickness products cover 1982 to the present using the Advanced Very High Resolution Radiometer (AVHRR) on NOAA polar-orbiting satellites.

65 Sea ice thickness is not a physical parameter that satellite visible and infrared sensors can observe directly, though altimeters provide a more direct measurement than passive microwave and visible/infrared instruments. Statistical models or physically based thermodynamic models with numerical parameterizations are needed to retrieve ice thickness with satellite observations (Wang et al. 2010, Kwok et al. 2016, Tian-Kunze et al. 2014). The underlying physical processes controlling ice growth and melting are so complex that uncertainties in the parameterizations in those models lead to large uncertainties in the 70 ice thickness products. For example, the depth of snow on sea ice is a critical parameter for all the ice thickness retrieval methods, and yet, currently, there is no direct way to accurately measure it from space, especially for snow on ice (Wang et al. 2010, Lawrence et al. 2018).

In addition to these satellite ice thickness products, sea ice thickness is also available from regional and global numerical models, e.g. the Pan-Arctic Ice-Ocean Modeling and Assimilation System (PIOMAS) (Zhang and Rothrock 2003, Schweiger 75 et al. 2011, 2019, Lindsay et al., 2012), and global climate models. Although the global climate models tend to underestimate the rate of ice volume loss and represent the thickness spatial patterns poorly, multi-model ensemble means provide realistic trends (Stroeve et al. 2014).

Sea ice thickness can also be derived from sea ice age. An Arctic sea ice age product covering the period from 1984 to the present has been generated based on Lagrangian tracking of individual sea ice parcels (Tschudi et al. 2019a). Each parcel

Deleted: relatively  
Deleted: satellite  
Deleted: in  
Deleted: for  
Deleted: s

Deleted: the  
Deleted: ,  
Deleted: the Ice, Cloud, and land Elevation Satellite (ICESat)  
Deleted: CryoSat  
Deleted: respectively  
Deleted: will also be available  
Deleted: in the near future  
Deleted: The  
Deleted: sea ice thickness products

Deleted: while some satellite observations are sensitive to the ice thickness. Thus  
Deleted: ,  
Deleted: ,  
Deleted: s  
Deleted: S  
Deleted: e.g.  
Formatted: Font color: Text 1

Deleted: , Laxon et al. 2013

Formatted: Font: Not Italic, Complex Script Font: Italic

is tracked independently, and the oldest age of all possible ice parcels within each grid cell is assigned to the cell. Studies have shown that a generally linear relationship exists between ice age and ICESat sea ice thickness from 2003 to 2008 (Maslanik et al. 2007, Tschudi et al. 2016), and such a relationship has been applied to estimate the sea ice thickness in March extending back to the early 1980s (Maslanik et al. 2007). The uncertainty of this relationship appears to increase from new ice to older ice, with values ranging from approximately 0.2 to 1.0 m (Figure 2 in Maslanik et al. 2007, and Figure 2 in Tschudi et al. 2016). However, the way in which the relationship between age and thickness varies over the course of the year and over the multi-decadal time series was not considered in that work. If sea ice thickness and sea ice age relationships were available for all months of the ice age dataset, a more comprehensive ice thickness dataset could be created. To establish the relationship between age and thickness in the earlier years, here we use Arctic sea ice draft data that have been collected by U.S. Navy submarines since 1958, with data from 1975 to 2000 publicly available (Rothrock et al. 2008, NSIDC 1998). Furthermore, ice thickness can be combined with ice concentration data to produce a new ice volume product.

This paper presents Arctic Ocean sea ice thickness and volume from 1984 to 2018 based on an existing sea ice age product. Relationships between ice age and ice thickness are established for all months over the period 1984-2018. Weekly ice thickness is then produced based on the weekly ice age product, followed by the calculation of monthly ice volume. Spatial distributions and temporal trends of the derived sea ice thickness and volume are presented. The ice age-based thickness and volume data set from 1984 to 2018 is also compared to existing data sets. These ice thickness and ice volume estimates are a proxy based on ice age, thus are not intended as a direct replacement for sea ice thickness observations.

## 2 Data and Methods

### 2.1 Data

#### 2.1.1 Data for Algorithm Development

A weekly sea ice age product from 1984 to 2018 is available from the National Snow and Ice Data Center (NSIDC, Boulder, Colorado, USA; Tschudi et al. 2019b). The latest version of this product is 4.0. In the product the ice age category represents how long in years the sea ice has existed since its first appearance, which is estimated through Lagrangian tracking of the ice from week to week using gridded ice motion vectors (Maslanik et al. 2007, Maslanik et al. 2011, Tschudi et al. 2019b). The weekly ice motion vectors are generated by merging the ice motion vectors from visible/infrared and passive microwave sensors, International Arctic Buoy Program (IABP) buoys, and the NCEP/NCAR Reanalysis. Since late 1978, ice age has been estimated by tracking each grid cell with ice as a discrete, independent Lagrangian parcel advected by the weekly ice motions. The oldest age of a single grid cell of parcels with different ages is assigned to the parcel/cell (Maslanik et al. 2011, Tschudi et al. 2019b). A parcel's age gains a year if it survives the summer minimum sea ice extent, which means that the ice concentration of a grid cell remains at or above 15% throughout the melt season. With each weekly file, an ice age value ranging from 1 up to 16 years (since its first appearance) is assigned to each of 722 by 722 grid cells corresponding to

Formatted: Font: Not Italic, Complex Script Font: Italic

Formatted: Font: Not Italic, Complex Script Font: Italic

Formatted: Font: Not Italic, Complex Script Font: Italic

Deleted: the

Deleted: the

Deleted: are

Deleted: robust

Deleted: can

Deleted: naval

Formatted: Heading 3

Deleted: has been generated (Tschudi et al. 2019a), and the latest version of this product, version 4.0,

Deleted: T

Deleted: n

Deleted: l

Deleted: a

Deleted: passive

Deleted: is

Deleted: a

Deleted: (

the 12.5 km Equal-Area Scalable Earth Grid (EASE-Grid) covering the Arctic. We used the weekly ice age products from 150 1984 to 2018 in this study (Tschudi et al., 2019b). Any ice age older than four years is classified as one ice age group in this scheme.

Monthly sea ice concentration from 1984 to 2017 and daily data in 2018 that were produced with the NASA Team algorithm at 25 km polar stereographic grid were obtained from NASA's Distributed Active Archive Center (DAAC) at NSIDC (Cavalieri et al. 1996). Monthly sea ice concentration for 2018 are calculated from the daily data. Monthly mean sea ice 155 thickness and volume data 1984-2018 from PIOMAS version 2.1 (Zhang and Rothrock, 2003, Schweiger et al. 2011) are also used. PIOMAS couples the Parallel Ocean Program with a 12-category thickness and enthalpy distribution sea ice model in a generalized orthogonal curvilinear coordinate (GOCC) system. PIOMAS has the capability of capturing the basic upper-ocean circulation features in the polar regions and of assimilating some observations. Boundary inputs at 45 degrees North latitude 160 come from a global ocean model. Sea ice concentration from passive microwave measurements and sea surface temperature from the NCEP/NCAR Reanalysis are assimilated in the system, with atmospheric drivers from the NCEP/NCAR Reanalysis including wind, surface air temperature, and cloud cover (Schweiger et al. 2011). Monthly mean ice thickness data from 1978 are available in a generalized curvilinear coordinate system covering 45 degrees North poleward with a grid size of 360 by 120.

U.S. Navy submarines have collected upward looking sonar (ULS) sea ice draft data in the Arctic Ocean since 1958. 165 Originally classified, the data have been declassified and released according to set guidelines, which include restrictions that positions of the data must be rounded to the nearest five minutes of latitude and longitude, the date is to be rounded to the nearest third of a month, and the data are within an irregular polygon in the Arctic Ocean (NSIDC 1998). Submarine data were also collected in the SCience ICe EXercise (SCICEX) program. The SCICEX data are not classified so that the precise location and date are available. All the data are processed to provide ice draft profiles in segments and derived statistics of each segment, including ice draft characteristics (e.g., mean draft thickness), leads, etc. [Assessment shows that the ice thickness has a positive bias of 0.29 m, and the standard deviation is 0.25 m \(Rothrock and Wensnahan 2007\)](#). The 1984-2000 submarine ice thickness 170 data from NSIDC are used here, including data from SCICEX93, SCICEX96, SCICEX97, SCICEX98, and SCICEX99 (Figure 1). The irregular polygon outlining the SCICEX data release area (DRA) is shown in Figure 1.

Rothrock et al. (2008, hereinafter RPW08) analyzed these submarine data, and studied the annual cycle of the ice 175 thickness and the interannual change in the mean ice thickness. [RPW08 showed that the ice draft, which is the thickness of the ice below the waterline, can be converted to ice thickness using the equation](#)

$$T = 1.107D - f(\tau) \quad (1)$$

where  $T$  and  $D$  are ice thickness and draft, respectively, and  $f(\tau)$  is the snow ice equivalent as a function of the decimal fraction 180 of the year  $\tau$ . This conversion approach is the same as equation 3 in RPW08. The monthly mean of  $f(\tau)$  can be found in Table 4 in RPW08 and is also listed in Table A1 of the Appendix here.

The averaged ice thickness over the SCICEX box as a function of year and decimal fraction of the year is derived by RPW08 using

Deleted: s

Deleted: ;

Deleted: also

Deleted: 5

Deleted: ,

Deleted: from 1984 to 2000

Deleted: T

Deleted: is

Deleted: total

Deleted: :

Deleted: ice

Deleted: thickness

Deleted: interannual change with the annual cycle superimposed in averaged ice thickness over the SCICEX box

Deleted: :

$$T = 1.107[\bar{D} + I(t - 1988) - \bar{I} + A(\tau)] - \bar{f} \quad (2)$$

where  $\bar{D}$  is 2.97 m,  $t$  is the year,  $\bar{f}$  with a value of 0.076 is the annual mean of  $f(t)$ , and  $\bar{I}$  with a value of -0.12 m is the mean of  $I$ .

$$I(t - 1988) = I_1(t - 1988) + I_2(t - 1988)^2 + I_3(t - 1988)^3 \quad (3)$$

where  $I_1 = -0.0748$ ,  $I_2 = -0.00219$ , and  $I_3 = 0.000246$ . In Eq. 2,

$$A(\tau) = A_{s0} \sin(2\pi\tau) + A_{c0} \cos(2\pi\tau) \quad (4)$$

where  $A_{s0} = 0.465$ ,  $A_{c0} = -0.250$ . These equations were taken from RPW08. Eq. 2 will be used to calculate the mean ice thickness using the approach of RPW08 shown in their Figure 8. Rothrock and Wensnahan (2007) determined a positive bias of 0.29 m in the ice thickness derived from submarine ULS data, and suggested a bias correction. In this study, we therefore reduce individual ice thickness observations by 0.29 m in all the original submarine observations. Details of the above equations and the bias determination are available in Rothrock and Wensnahan (2007).

### 2.1.2 Data for Evaluation/Validation

Ice thickness and volume values from Kwok (2018, hereinafter RK18) are used in this study. In particular, we used the average Arctic sea ice volume and ice thickness from ICESat in February and March 2004 to 2008, and in October and November 2003 to 2007, as well as CryoSat-2 Arctic sea ice thickness and volume in February and March, and in October and November from 2011 to 2018 (Figure 2 and 3 in RK18). Note that the ICESat ice thickness data are used to develop the age-based thickness algorithm, and are therefore not an independent evaluation/validation data set. The CryoSat-2 ice thickness and volume, inferred from Figure 2 and 3 from RK18, are not directly used in the algorithm development and are instead used for validation.

Sea ice thickness data generated by OTIM with AVHRR data covers 1982 to the present, and is included in the AVHRR Polar Pathfinder-extended (APP-x) dataset (Key, et al., 2016). The OTIM ice thickness data are for both poles at a 25 km EASE2 Grid on a twice daily basis. Initially it was based on the surface energy balance at thermal-equilibrium at the interface between the atmosphere and the ice, which may or may not be covered by snow (Wang et al. 2010). OTIM has gradually evolved into a physical-statistical hybrid model that contains all components of the surface energy budget to estimate sea/lake/river ice thickness. Two parameterization schemes of ice thermal-dynamic and physical-dynamic processes have recently been added to account for ice growth/melt, and ice rafting/hummocking processes. It should be noted that the OTIM ice thickness estimates are not available when the solar zenith angle is greater than 85 degrees and less than 91 degrees due to large uncertainties in the input surface albedo, cloud mask, and surface shortwave radiation, or when the ice surface temperature is greater than the freezing point. The accuracy of the input parameters – including snow depth, surface humidity, temperature, and wind – can significantly impact the accuracy of ice thickness calculations. Validation studies of OTIM ice thickness were performed with sea ice thickness measurements from ULS on submarines and moorings, as well as ground measurements. The overall accuracy (mean absolute bias) and uncertainty (root-mean-square difference, RMS) of the OTIM

- Deleted: and
- Formatted: Font: Italic, Complex Script Font: Italic
- Deleted:
- Deleted: (
- Deleted: )
- Deleted:
- Deleted: (
- Formatted: Font: Italic, Complex Script Font: Italic
- Deleted: )
- Formatted: Font: Italic, Complex Script Font: Italic
- Deleted: . In Eq. 2,
- Formatted: Font: Italic, Complex Script Font: Italic
- Deleted: All t
- Deleted: T
- Deleted: ,
- Deleted: these equations
- Formatted: Font: Italic, Complex Script Font: Italic
- Commented [MOU1]: Is this correct?
- Deleted: in the results section.
- Deleted: Details of these equations is available in RPW08.
- Deleted: Details about the bias determination is available in Rothrock and Wensnahan (2007).
- Deleted: and area mean ice thickness
- Formatted: Heading 3
- Deleted: CryoSat
- Deleted: and thickness
- Deleted: Please n
- Deleted: thus they
- Deleted: are
- Deleted: are
- Commented [MOU2]: Is this correct?
- Deleted:
- Deleted: the
- Deleted: ing
- Deleted: ing

estimated ice thickness is approximately 0.20 m (less than 20%) and 0.54 m, respectively, over all types of sea ice (Wang et al., 2010, 2016).

Besides the CryoSat-2 ice thickness and volume in February/March and October/November from RK18, we also calculated the area-averaged monthly mean ice thickness and volume over the Arctic Ocean using CryoSat-2 from 2011 to 2018, and Envisat from 2003 to 2010. Three monthly mean CryoSat-2 ice thickness products in January, February, March, April, October, November, and December from 2011 to 2018 are used, from NASA GSFC (Goddard Space Flight Center) (Kurtz et al. 2014), the AWI (Alfred Wegener Institute) (Hendricks and Ricker 2019), and the CPOM (Centre for Polar Observation and Modelling Data Portal) (Laxon et al. 2013). The NASA GSFC data is available from NSIDC on a 25 km polar stereographic grid (Kurtz and Harbeck 2017). The AWI data on a 25 km EASE2 grid is available at [ftp://ftp.awi.de/sea\\_ice/product/cryosat2/v2p2/nh/l3c\\_grid/monthly](ftp://ftp.awi.de/sea_ice/product/cryosat2/v2p2/nh/l3c_grid/monthly). The CPOM data at 5 km spatial resolution is available at <http://www.cpom.ucl.ac.uk/csopr/seaiice.html>. Monthly mean Envisat ice thickness on a 25 km EASE2 grid in January, February, March, April, October, November, and December from 2003 to 2010 are from the European Space Agency's (ESA) Climate Change Initiative (CCI) version 2 product. They are available at [ftp://anon-ftp.ceda.ac.uk/neodc/esacci/sea\\_ice/data/sea\\_ice\\_thickness/L3C/](ftp://anon-ftp.ceda.ac.uk/neodc/esacci/sea_ice/data/sea_ice_thickness/L3C/).

Each of these ICESat and CryoSat-2 ice thickness products has its uncertainty. The major contributors of these uncertainties are uncertainties in snow depth and snow density, and overall uncertainty in ice thickness is estimated around 0.7 m (Kwok and Cunningham 2008). Kwok and Rothrock (2009) estimated the ICESat ice thickness uncertainty around 0.37 m. Comparisons with in situ ice thickness observations show unbiased ice thickness estimation in CPOM CryoSat-2 ice thickness, with uncertainties from 34 cm to 66 cm, and error analysis shows the uncertainties in Arctic-wide sea ice volume are typically about 13.5% (Tilling et al. 2017). Comparison of NASA GSFC CryoSat-2 ice freeboard to IceBridge data shows a rms difference range from 7.4 to 11.1cm in ice freeboard retrievals(Kurtz et al. 2014). The percentages of ice thickness uncertainty to the ice thickness from AWI CryoSat-2 monthly mean ice thickness from 2011-2018 range from around 35% at mean thickness at 1.4 m to around 20% at mean thickness at 5 m (Figure A1 in appendix).

All these products are remapped to a 25 km polar stereographic grid to match the derived products of this study. Area averaged monthly mean ice thicknesses over the Arctic Ocean are calculated for each of these products. Monthly mean Arctic sea ice volume is calculated as the product of sea ice thickness, ice concentration, and grid cell area of all grid cells as explained in the next section.

## 2.2 Method

The first step is to establish the relationship between ice age and thickness for the times between 1984 and 2018 when the ice age thickness data are available. The relationships are derived first in two months of a year, April and September from 1984 to 2000 using submarine ice thickness data, and March and October from 2004 to 2008 using ICESat ice thickness data. Ice draft of each segment is converted to ice thickness using Eq. 1, and the middle point of each segment is remapped to the 12.5 km EASE-Grid to match the ice age data. Each ice draft profile segment is collocated with its surrounding nine ice age

Deleted:

Deleted: ,

Deleted: inferred from Figure 2 and 3 from RK18

Deleted: in January, February, March, April, October, November, and December

Deleted: at

Deleted: at

Deleted: P

Deleted: S

Deleted: a

Deleted: t

Deleted: at

Deleted: the

Deleted: , and t

Deleted: P

Deleted: S

Deleted: more details in the "Method"

Deleted: ,

Deleted: thickness

310 values in the corresponding weekly ice age product. For ice draft profiles not from SCICEX, because of the restrictions on  
revealing the exact date, their observational dates are assigned to day 5, 15, or 25 when they are in the first, second, and third  
ten days of a month, respectively. We collocate each ice draft profile segment with its surrounding nine ice age values from  
its corresponding weekly ice age product, as well as the week before and after, for a total of 27 ice age values. The final ice  
age is determined as the age at the center of the nine points if it has the same ice age as the majority (>60%) of the nine (27)  
ice age samples for SCICEX. Otherwise, no ice age is determined. All matched ice thickness and age samples in a month  
315 within a 10-year moving window are used to derive the relationship of ice age and ice thickness in that month at the fifth of  
the ten years. Only ice draft profile segments longer than 15 km are included; changing the threshold to 10 km, however, does  
not change the overall relationship. For each ice age category, a relationship is derived if the number of samples in a month is  
greater than 40. For example, we started with data in April and September from 1984 to 1993 to obtain the relationship in  
April and September for 1988 (the middle of the 10 years), and ended with data in April and September from 1991 to 2000 to  
320 obtain the relationship in April and September for 1995. Because the submarine measurements are concentrated in the spring  
and autumn, meaningful relationships are determined only in April and September.

Using the collocated ice age and thickness from ICESat over the period 2004 to 2008, Tschudi et al. (2016) derived the  
relationship between the two for February through April over the Arctic Ocean. We assign this relationship to the month of  
March. However, information for such a relationship is not available for other months. According to Figure 2 in RK18, the  
325 mean ice thickness in October and November is approximately 0.7 m less than the mean in February and March. Therefore, in  
October we assign the relationship of ice age and ice thickness to be the same as that in March except that ice thickness in each  
age category is 0.70 m less.

Figure 2 shows the relationship between ice age and ice thickness in April and September from 1988 to 1995 using  
submarine measurements, and in March and October from 2004 to 2008 using ICESat data from Tschudi et al. (2016). Older  
330 sea ice is generally thicker than younger ice, except that ice more than four years old is slightly thinner than four-year old ice  
based on submarine measurements before 2000. This phenomenon was observed in one of five years (2008 in 2004-2008)  
using ICESat data (Tschudi et al. 2016), but it is persistent in most years from 1988 to 1995 in the submarine data. The physical  
mechanism for this relationship is not clear. Since 1984, for every ice age category, sea ice thickness has generally been  
decreasing. As in Tschudi et al. (2016), we use linear regression to derive the relationship between ice age and thickness for  
335 ice age from one to four years, while the relationship for ice older than four years remains unchanged. Then linear regression  
on ice thickness from 1988 to 1996 is used to smooth the ice thickness in each age category.

Relationships between ice age and thickness for every month are needed to convert the weekly ice age data into ice  
thickness. Though we have such relationships in two months of every year from 1988 to 1995, and from 2004 to 2008,  
relationships for all other months are needed. For this purpose, we apply an empirical model to the annual cycle of ice thickness.  
340 In this model, ice thickness increases linearly from September to the following May and decreases linearly from May to  
September in each sea ice category (Figure 3). The selection of September and May is consistent with the fact that the surface  
has an energy flux gain from the atmosphere from May to September, and an energy flux loss to the atmosphere from

Deleted: ; w

Deleted: for individual months are recorded. Matched ice thickness and age samples

Deleted: (to increase the number of samples)

Deleted: each

Deleted: /

Deleted: (

Deleted: )

Deleted: (

Deleted: )

Deleted: (

Deleted: )

Deleted: of

Deleted:

Deleted: (2008)

Deleted: P

Deleted: generally

Deleted: s

Deleted: keeping

September to the following May (Serreze et al. 2007). From May to September the increase/decrease in sea ice thickness can be approximated by

$$T = G \times M + H_1 \tag{5}$$

365 where  $T$  is monthly mean ice thickness,  $G$  is the growth rate with units of m/month,  $M$  is month index from May to September, and  $H_1$  is a constant (m). From September to the following May,

$$T = D \times M + H_2 \tag{6}$$

370 where  $T$  is monthly mean ice thickness,  $D$  is growth/declining rate with unit of m/month,  $M$  is month index from September to the following May, and  $H_2$  is a constant (m). Given that both equations provide the same results for September and May, and the known relationship of ice age and thickness in April and September from 1988 to 1996, as well as in March and October from 2004 to 2008, we derive  $G$ ,  $D$ ,  $H_1$ , and  $H_2$ , thereby determining the relationship between ice age and thickness for every month in those years following Eqs. 5 and 6. For the years before 1988 and after 2008, we use the relationship for 1988 and 2008; for years from 1996 to 2003, we derive the relationship using linear interpolation of the relationship for 1995 and 2004.

375 Figures 2b and 2d show the derived relationships of ice age and thickness for April and September from 1984 to 2018. After the annual cycle of the relationship between ice age and thickness is linearly interpolated to the weekly scale, we convert weekly ice age to weekly ice thickness and determine the daily ice thickness using linear interpolation and thus calculate the monthly mean ice thickness. An example of such conversion is shown in Figure 4.

380 Monthly mean ice thickness in the 12.5 km EASE-Grid is then remapped to 25 km polar stereographic projection to match the spatial resolution of sea ice concentration. The PIOMAS and OTIM monthly mean ice thickness are also remapped to the same polar projection. Monthly mean Arctic sea ice volume is calculated as the product of sea ice thickness, ice concentration, and grid cell area of all cells over an area defined in RK18. Bounded by the gateways into the Pacific (Bering Strait), the Canadian Arctic Archipelago, and the Greenland (Fram Strait) and Barents Seas, the area covers approximately  $7.23 \times 10^6$  km<sup>2</sup>. We will refer to this area as the Arctic Ocean, as in RK18, shown as a polygon in Figure 13. Monthly mean  
385 sea ice thickness is also calculated over the DRA, as defined in RPW08. Hereinafter, we call the sea ice thickness and sea ice volume derived from the ice age product as “IceAgeDerived.”

### 3 Results

#### 3.1 Evaluation of ice thickness and Arctic ice volume

390 Based on submarine sonar data, RPW08 derived an equation – Eq. 9 in their paper and Eq. 2 here – to calculate the inter-annually averaged ice thickness over the DRA with the annual cycle superimposed. Mean sea ice thickness over the DRA in February and March, as well as in October and November, from 1984 to 2000 are calculated here using this equation. RK18 reported the mean sea ice thickness over the DRA from ICESat in February and March 2004-2008, and in October and November 2003-2007, and from CryoSat-2 in February and March and in October and November 2011-2018. RK18 also

Deleted: →

Deleted: →

Deleted: both

Deleted: grid

Deleted: , and as the polygon outlined

Deleted: CryoSat



400 reported monthly mean Arctic ice volume over the Arctic Ocean from ICESat in February and March 2004-2008 and in October  
and November 2003-2007, and from [CryoSat-2](#) in February and March and in October and November 2011-2018. These data  
are used to evaluate the quality of sea ice thickness and volume of the IceAgeDerived.

Deleted: CryoSat

IceAgeDerived sea ice thickness over the DRA is close to the one-to-one line in comparison to ice thickness from  
submarine in February/March, with a bias of 0.03 m, RMSE of 0.074 m, and R-squared value of 0.96 (Figure 5 and Table 1).  
405 In October/November the bias is -0.035 m, the RMSE is 0.14 m, and the R-squared is 0.97. Compared to ICESat, sea ice  
thickness over the DRA gives a slightly larger bias and RMSE and slightly smaller R-squared, with a bias of -0.014 m, RMSE  
of 0.096 m, and R-squared of 0.75 in February/March (Figure 5, Table 1). In October/November, the bias is 0.20 m, the RMSE  
is 0.16 m, and the R-squared is 0.93. The bias and RMSE values are well within the uncertainty of ICESat ice thickness  
estimates of 0.37 m (Kwok and Rothrock, 2009). Comparison to [CryoSat-2](#) sea ice thickness over DRA shows a bias of -0.21  
410 m and RMSE of 0.079 m for February/March, and a bias of -0.04 m and RMSE of 0.14 m for October/November. These are  
comparable in magnitude to those from ICESat, and within the uncertainty of [CryoSat-2](#) ice thickness (Kwok 2018). The R-  
squared in October/November is *near zero (0.037)*. *With the relatively small bias and RMSE, this indicates that the*  
IceAgeDerived sea ice thickness has similar values, but does not follow the changes in [CryoSat-2](#) sea ice thickness from 2011  
to 2018 (Figure 5 and Table 1). Comparing the results of PIOMAS to submarine and ICESat thickness in Table 1 show similar  
415 bias and RMSE results as those in Schweiger et al. (2011).

Deleted: CryoSat

Deleted: CryoSat

Deleted: close to 0, which

Deleted: ,

Deleted: CryoSat

Deleted: in October/November

Measurements of IceAgeDerived sea ice volume over the Arctic Ocean agree with those from ICESat in February/March,  
with a bias of  $-0.72 \times 10^3 \text{ km}^3$ , RMSE of  $0.74 \times 10^3 \text{ km}^3$ , and R-squared of 0.87 (Figure 6 and Table 2). In October/November,  
IceAgeDerived sea ice volume is largely underestimated compared to ICESat, with a bias of  $-3.95 \times 10^3 \text{ km}^3$ , even though  
IceAgeDerived sea ice thickness measurements agree well with those from ICESat over DRA. Similar underestimations in  
420 October/November are found for PIOMAS and OTIM when compared to ICESat. Comparison to [CryoSat-2](#) sea ice volume  
shows low bias and low RMSE, where the bias is  $0.29 \times 10^3 \text{ km}^3$  ( $-0.66 \times 10^3 \text{ km}^3$ ) and the RMSE is  $0.75 \times 10^3 \text{ km}^3$  ( $0.98 \times 10^3$   
 $\text{km}^3$ ) in February/March (October/November).

Deleted: CryoSat

Comparisons of sea ice thickness over DRA and sea ice volume over the Arctic Ocean from PIOMAS and OTIM  
to submarine ULS, ICESat and [CryoSat-2](#) are also shown in Figures 5 and 6, and in Tables 1 and 2. IceAgeDerived products  
425 show comparable or slightly better results in terms of bias, RMSE, and R-squared. The better agreement with submarine ULS  
can be attributed to the fact that the IceAgeDerived product is developed based on matched ice age and submarine ULS ice  
thickness data, *and collocated ice age and ICESat thickness data*. However, it should be noted that while submarine data in  
April and September are used in the algorithm development, the comparisons are in February/March and October/November.

Deleted: CryoSat

Deleted: the

Deleted: again

Deleted: Cryosat

Deleted: were

Deleted: derived

Deleted: IceAgeDerived ice thickness and volume are compared to monthly mean Cryosat-2 ice thickness from AWI, NASA GSFC, and CPOM

Deleted: in comparisons

Deleted: shown

Deleted: Cryosat

*A comprehensive assessment of IceAgeDerived ice thickness and ice volume with those from CryoSat-2 was carried out.*  
430 *The CryoSat-2 ice thickness and ice volume from NASA GSFC, AWI, and CPOM were not used in the algorithm development,*  
*and thus provide independent evaluation/validation information. The comparison is done for the period 2011-2018. Figures 7*  
*and 8 show the results, with statistics given in Table 3. The IceAgeDerived has slightly smaller monthly ice thickness and*  
*volume compared to AWI, CryoSat-2 products in most months, with overall ice thickness mean bias (standard deviations) of -*

455 0.02 m (0.11 m) and overall ice volume mean bias of  $-0.76 \times 10^3 \text{ km}^3$  ( $0.86 \times 10^3 \text{ km}^3$ ). Comparison to NASA GSFC CryoSat-2 products shows the largest negative bias in those months among the three, with overall mean bias (standard deviations) of  $-0.27 \text{ m}$  ( $0.15 \text{ m}$ ) and  $-1.79 \times 10^3 \text{ km}^3$  ( $0.95 \times 10^3 \text{ km}^3$ ) for ice thickness and ice volume respectively. The negative biases to CPOM CryoSat-2 products are in between.

460 Though the comparison to the CryoSat-2 ice products show overall agreement in both thickness and volume, further investigation and analysis shows that there are rather apparent differences in the ice thickness retrieval spatial distributions as shown in Figure 9. These noted differences are surely a research topic for future studies. It appears the IceAgeDerived ice thickness underestimates the ice thickness for the older ice while overestimates the ice thickness for the new ice with comparison to CryoSat-2. It should be also noted that CryoSat-2 also has relatively high uncertainties for very thin and very thick sea ice. In total, these underestimates and overestimates may balance off in the overall mean ice thickness and ice volume comparisons.

465 Similar evaluation and validation are carried out through a comparison to Envisat from 2003 to 2010. Figures 10 and 11 are scatter plots of the results, with statistics given in Table 4. The monthly mean ice thickness shown in the figures is the mean ice thickness of all pixels in a month. It shows that the monthly IceAgeDerived thickness and volume are comparable to the ESA CCI Envisat products in all months, with overall mean biases (standard deviations) of  $0.07 \text{ m}$  ( $0.10 \text{ m}$ ) and  $-0.08 \times 10^3 \text{ km}^3$  ( $0.57 \times 10^3 \text{ km}^3$ ).

470 The monthly mean CryoSat-2 ice thickness from CPOM, AWI, and NASA GSFC from January to April, and from October to December of 2011 to 2018 are used to calculate the spread of CryoSat-2 ice thickness within each ice age category, as those in Tschudi et al. (2016). The collocated NSIDC weekly ice age with CryoSat-2 monthly ice thickness from all available months over the period 2011 to 2018 can be used to derive such spreads in all months, as shown for March and November in Figure 12. Ice thickness increases with ice age for ages from 1 to 4 years and then decreases from ages 4 to 5. This is consistent with what was found based on upward looking sonar data. In Tschudi et al. (2016) ice thickness increases from ice age from 1 to 5. Similar to those in Tschudi et al. (2016) (Figure 2 in their paper), one standard deviation of the probability distribution function of CryoSat-2 thickness in an age category overlaps with adjacent age categories. The overlap may be a result of mismatches in the collocation of weekly ice age with monthly ice thickness. To estimate the random uncertainty of the IceAgeDerived ice volume over the Arctic Ocean, we applied the ice thickness uncertainty errors in each ice age category (Figure 12) when converting the weekly ice age to ice thickness from 1984 to 2018. The uncertainty in weekly or monthly ice volume over the Arctic Ocean is the sum of the ice volume uncertainty of all grid cells, where the ice volume uncertainty in a cell is the product of the sea ice concentration, the grid cell area, and the ice thickness uncertainty. This provides the upper limit on the random uncertainty in ice volume. The overall uncertainties in ice thickness and ice volume in every month from 1984 to 2018 are derived. The average ratios of ice volume uncertainties to the mean range from 21% to 29% over the period

475  
480  
485

Deleted: Cryosat

Formatted ... [1]

Formatted ... [2]

Deleted: Cryosat...ryoSat-2 ice products show overall agreement in both thickness and volume, further investigation and analysis shows that there are rather apparent differences in the ice thickness retrieval spatial distributions as shown in Figure 9. These noted differences are surely a research topic for future studies. It appears the IceAgeDerived ice thickness underestimates the ice thickness for the older ice while overestimates the ice thickness for the new ice with comparison to Cryosat...ryoSat-2. It should be also noted that Cryosat ... [3]

Deleted: ... validation are carried out with...through a comparison to Envisat from 2003 to 2010. Figures 10 and 11, ...show the...re scattering...plots of the comparisons...esults, with statistics shown...even in Table 4. The monthly mean ice thickness shown in the figures is the mean of...ce thickness of all pixels in a month. It shows that the monthly IceAgeDerived thickness and volume are comparable monthly ice thickness and volume ...o the ESA CCI EnvisS ... [4]

Formatted ... [5]

Deleted: M...nthly mean Cryosat...ryoSat-2 ice thickness from CPOM, AWI, and NASA GSFC from January to April, and from October to December of 2011 to 2018 are used to calculate the spread of CryoSat-2 ice thickness within each ice age categories...as those in Tschudi et al. (2016). The collocated NSIDC weekly ice age with Cryosat...ryoSat-2 monthly ice thickness from all available months over the period 2011 to 2018 can be used to derive such spreads in all months, as shown for those...in...arch and November in Figure 12. Ice thickness increases with ice age for ice...ges from 1 to 4 years,...and then decreases from ice...ges 4 to 5. This is consistent with what we found...as found based on upward looking sonar data. In this trend shows similarity and difference with what were found in...schudi et al. (2016), where...ce thickness increases from ice age from 1 to 5. Similar as...o those in Tschudi et al. (2016) (Figure 2 in their paper), one sigma...tandard deviation of the probability distribution function of Cryosat...ryoSat-2 thickness in an age category crosses another...overlaps with adjacent age categories. Please note that...t...e crosses...overlap may be a result of come from...ismatches of...n the collocation of weekly ice age with monthly ice thickness. The estimation of ice thickness from ice age can still be valid, however, the crosses lead to uncertainty in the ice thickness estimation based on ice age...o estimate the random uncertainty of the IceAgeDerived ice volume over the Arctic Ocean,...we applied the ice thickness uncertainty...errors bar in Figure 12...n each ice age category (Figure 12) while...hen converting the weekly ice age to ice thickness from 1984 to 2018. The uncertainty in weekly or monthly ice volume over the Arctic Ocean is the sum of absolute of the ice volume uncertainty of all grid cells, where the ice volume uncertainty in a cell is the production...of the sea ice concentration, the grid cell area, and the ice thickness uncertainty... This at that grid...rovides the upper limit of...n the random uned...rtainty in the...ce volume. The overall uncertainties in the ice thickness and ice volume in every month from 1984 to 2018 are derived. The average ratios of ice volume uncertainties to the mean range from 21% to 29% from...ver the period 1984 to ... [6]

595 **3.2 Sea ice thickness and volume climatology and trend**

Deleted: 4

Deleted: the

Deleted: 7

The spatial distributions of the IceAgeDerived ice thickness over the Arctic from 1984 to 2018 show similar spatial patterns, but different magnitudes in the four seasons (Figure 13). Sea ice is the thickest along the northern portion of the Canadian Archipelago and Greenland, decreasing radially, with the thinnest ice over the Arctic's peripheral seas on the Eurasia side. The thickest sea ice appears in the spring, around 3 m in the Canada Basin and North Pole areas. The thinnest sea ice is in early fall, around or less than 1 m over the coastal areas of the Kara, Laptev, and Chukchi Seas. The spatial distributions of PIOMAS and OTIM (Figures A2 and A3 in the Appendix) show similar patterns, while the ice thickness north of the Canadian Archipelago and Greenland is thinner, especially when compared to PIOMAS.

Deleted: 1

Deleted: 2

The annual cycle of monthly mean sea ice volume over the Arctic Ocean shows a minimum value in September at around 6770 km<sup>3</sup>, then increasing to the maximum value in the following May at around 21737 km<sup>3</sup>, followed by a decrease. This annual cycle is certainly affected by the model physics used to depict the ice growth/melt as shown in Figure 3. The annual cycle closely follows the sea ice volume annual cycle of the PIOMAS (Figure 14), which uses a different approach to derive ice thickness and ice volume. The IceAgeDerived exhibits its largest sea ice volume difference of 2004 km<sup>3</sup> in May. This difference can be attributed to the relatively thicker sea ice from the IceAgeDerived in the years before 2000, which is discussed further below. Ice volume over the Arctic Ocean from OTIM has a similar annual cycle but with a larger magnitude, with the maximum in April and the minimum in September.

Deleted: theoretical

Deleted: 8

The time series of sea ice thickness over DRA in February and March from 1984 to 2018 shows a decreasing trend from 1984 to 2000 and good agreement with the time series from submarine ULS, a generally decreasing trend from 2004 to 2008 as also shown in time series from ICESat, and a relatively unchanging state from 2011 to 2018 as also depicted in time series from CryoSat-2 (Figure 15a) as also seen in Haas et al. (2017). A similar conclusion can be drawn for the time series in October and November (Figure 15b). The overall decreasing trends are consistent with observations of the replacement of multiyear sea ice with first year ice in the Arctic Ocean, and partial recovery of multiyear sea ice after the summer of 2008 (Maslanik et al. 2007, Maslanik et al. 2011). This agreement can be attributed to the fact that the sea ice age information in the ice age product, including intrinsic features of general decreasing and partial recovery of multiyear sea ice after 2008, is utilized to derive the ice thickness. Compared to the PIOMAS ice thickness, in February/March the sea ice thickness in the 1980s is mostly greater, and remains close to or smaller than that of PIOMAS from 2004 to 2008, and is smaller from 2011 to 2018. In October/November the sea ice thickness is greater in the 1980s, comparable from 1990 to 2010, and then larger afterwards. OTIM shows smaller ice thicknesses than both IceAgeDerived and PIOMAS in October/November, and mostly larger ice thickness in February/March except in the 1980s.

Deleted: close

Deleted: CryoSat

Deleted: 9

Deleted: 9

Deleted: are

The similarities and differences found here are consistent with the results shown in Figure 5 and Table 1, and partly explain the differences in the sea ice volume annual cycles shown in Figure 14. The time series of PIOMAS, and their comparisons with ICESat shown here, are similar to those in Schweiger et al. (2011). As a result of the differences in ice thickness from 1984 to 2018, the overall trends of ice thickness over the DRA from 1984 to 2018 are -0.054, -0.035, and -

Deleted: 8

0.036 m/year in February/March, and -0.040, -0.042, and -0.026 m/year in October/November for IceAgeDerived, PIOMAS, and OTIM respectively, with significance levels all higher than 95%.

645 Time series of sea ice volume over the Arctic Ocean show generally decreasing trends from 1984 to around 2008, and relatively stable conditions from 2011 to 2018 both in February/March and October/November, similar to the time series from  
PIOMAS and OTIM (Figure 16). This overall decrease agrees well with the dramatic decrease in sea ice extent and disappearance of multiyear sea ice reported in the literature (Stroeve et al. 2012, Maslanik et al. 2007, Maslanik et al. 2011). In February/March, PIOMAS shows smaller ice volume from 1984 to 2000 and similar values after 2000; OTIM shows higher ice volume after the 1990s. In October/November, PIOMAS shows smaller values in the 1980s and similar values afterwards, while OTIM shows consistently smaller ice volume before 2000. All three sea ice volumes are much lower than those from  
650 ICESat for 2003 to 2007 with comparable sea ice thickness over the DRA in those years; all three sea ice volumes are comparable to that from CryoSat-2, with similar results for sea ice thickness over the DRA. All these findings are consistent with what is shown in Figure 6 and Table 2. As with the results of the differences in ice volumes from 1984 to 2018, the overall trends in ice volume over the Arctic Ocean from 1984 to 2018 are -474, -258, and -311 km<sup>3</sup>/year in February/March, and -342, -305, and -230 km<sup>3</sup>/year in October/November for IceAgeDerived, PIOMAS, and OTIM respectively, with significance levels  
655 all higher than 95%. IceAgeDerived shows stronger ice volume reduction over the Arctic Ocean in February/March and in October/November when compared to PIOMAS and OTIM.

Arctic sea ice volume over the Arctic Ocean from 1984 to 2018 has been decreasing in every month of the year based on the IceAgeDerived product (Figure 17). The most reductions in volume from December to June occur from the 1990s to the 2000s and from the 2000s to 2010s. From July to November, the volume reductions from the 1980s to 1990s are comparable  
660 to those from the 1990s to 2000s. The volume reductions in all months are the least from the 2000s to the 2010s. It should be noted that the data in the 1980s starts in 1984, and the data for the 2010s ends in 2018. Though the decadal mean annual cycles of sea ice volume are similar in shape, the magnitudes of the cycles - in terms of the difference between April and September - have been decreasing, with around 18871 km<sup>3</sup> in the 1980s and 12169 km<sup>3</sup> in the 2010s.

Time series of the monthly mean sea ice volume over the Arctic Ocean for all months from 1984 to 2018 have similar  
665 features to those in February/March and October/November, with higher values in the 1980s than those of PIOMAS and OTIM, a generally decreasing trend from 1984 to 2008 as with PIOMAS and OTIM, and relatively stable conditions from 2011 to 2018, similar to PIOMAS and OTIM (Figure 18). As a result, the sea ice volume trends from the IceAgeDerived in every month are higher than those from PIOMAS and OTIM, except being comparable to PIOMAS from August to October (Figure 19). The monthly trends exhibit an annual cycle, with the maximum magnitude in May at -537 km<sup>3</sup>/year and minimum  
670 magnitude in September of -251 km<sup>3</sup>/year, which is the opposite of the annual cycle trend of mean sea ice thickness. OTIM also exhibits this feature, while the annual cycle of volume trends from PIOMAS shows no apparent monthly differences. The mean monthly trend of all months over the Arctic Ocean from 1984 to 2018 is -411 km<sup>3</sup>/year, which is higher in magnitude compared to -282 km<sup>3</sup>/year from PIOMAS and -269 km<sup>3</sup>/year from OTIM, with significance levels all higher than 95%. The PIOMAS mean monthly trend is similar to that derived from PIOMAS sea ice volume data for 1979 to 2012,  $-2.8 \times 10^3$

Deleted: 0

Deleted: CryoSat

Deleted: 1

Deleted: reductions

Deleted: 2

Deleted: 3

km<sup>3</sup>/decade with an uncertainty of 1.0×10<sup>3</sup> km<sup>3</sup>/decade as shown in Schweiger et al. (2011). The IceAgeDerived ice volume shows a stronger reduction in ice volume over the Arctic Ocean from 1984 to 2018.

Causes for the changes in the Arctic sea ice volume can be partitioned roughly into two categories: changes from sea ice thickness and changes from sea ice area. In a manner similar to that used by Liu et al. (2009), this partitioning can be estimated

685 by:

$$\frac{dV}{dt} = \frac{d(\sum A_i H_i)}{dt} \cong \frac{d(\bar{A}\bar{H})}{dt} = \bar{A} \frac{d\bar{H}}{dt} + \bar{H} \frac{d\bar{A}}{dt} \quad (7)$$

where  $V$  is the sea ice volume over the Arctic Ocean,  $A_i$  and  $H_i$  are the sea ice area and thickness in individual grid cells over the Arctic Ocean, and  $\bar{A}$  and  $\bar{H}$  are the mean sea ice area and thickness over the Arctic Ocean. The term  $\bar{A}(d\bar{H}/dt)$  represents the contribution of sea ice thickness changes to the overall trend, and the term  $\bar{H}(d\bar{A}/dt)$  represents the contribution of the sea ice area changes. For the Arctic sea ice volume from 1984 to 2018, the changes in sea ice thickness contribute to approximately 80% or more of the total trends from November to May; these contributions decrease to around 50% in August and September (Figure 20). The changes in sea ice area contribute to less than 30% of total trends in all months, with even lower contributions from December to May, which are less than 10%. PIOMAS shows similar trends, while OTIM shows a greater contribution from the sea ice area changes and less contribution of sea ice thickness changes from June to October. It should be noted that the sum of these two contributions is not 100% because the production of area means of thickness and ice area is only approximately equal to the total ice volume as shown in Eq. 7.

695

Figure 21 shows the time series of mean ice volume using the varying ice age-thickness relationships (as in Figure 16), using relationships in 1984, and using relationships in 2004-2008 (ICESat period). The overall trends are -411, -136, -156 km<sup>3</sup>/year from 1984 to 2018, respectively. This indicates that the replacement of multi-year ice by younger ice might only account for a relatively smaller part of the overall trend (~33% or ~38%, -136/-411 or -156/-411), while the changes in ice age and ice thickness relationships contribute more the overall trend. Since the ice age-thickness relationship change is small between the ICESat period and the CryoSat-2 period (see Figure 12 here and Figure 2 in Tschudi et al. 2016), larger changes in the ice age-thickness relationship may occur primarily between the mid-1980s and mid-2000s, where ice thickness decreases in each corresponding ice age category.

700

Sea ice extent in September has been decreasing, with a trend from 1997 to 2014 four times as large as that from 1979 to 1996 (Serreze and Stroeve, 2015). More solar heating that the ocean absorbs through the open water area is expected to thin the remaining ice for all ice categories, leading to even less sea ice and more solar heating. This may explain the decreasing ice thickness for corresponding ice ages. However, it appears that the accelerated decrease of ice thickness to corresponding ice age happens before the accelerated decreasing ice extent in September, which needs further investigation.

705

#### 710 4 Discussion and Conclusions

In this study, a multi-decadal Arctic sea ice thickness dataset covering the period 1984 to 2018 is created from an existing satellite-derived ice age product. The relationship between ice age and ice thickness is first established based on submarine

- Deleted: of the use of
- Deleted: to approximately
- Deleted: represent
- Deleted: respectively
- Formatted: Superscript
- Deleted: may
- Deleted: s
- Deleted: s
- Deleted: Cryosat
- Deleted: (
- Deleted: )
- Deleted: this
- Deleted: changes
- Deleted: mainly
- Deleted: happen
- Deleted: middle
- Deleted: dle
- Deleted: that
- Deleted: in the next summer

upward-looking sonar ice draft observations from 1984 to 2000, and ICESat ice thickness from 2003 to 2008. Both are available for only two calendar months. Therefore, an empirical model of the annual cycle of sea ice thickness growth/melt is used to derive the ice age and ice thickness relationship for every month from 1984 to 2018. Sea ice volume over the Arctic Ocean is then calculated from ice thickness and concentration. [These ice thickness and volume estimates are a proxy from ice age products, thus they are not a direct replacement for sea ice thickness observations.](#) Comparisons of the time series of derived ice thickness and ice volume with those from the literature and other data sets using different approaches show general similarities but with some notable differences. The agreement proves the soundness of the ice aged-based ice thickness and ice volume dataset, while the differences indicate there is room for further improvement in all the ice thickness data sets.

The major findings of this study include:

- Sea ice thickness derived from ice age (“IceAgeDerived”) over the DRA (the submarine data release area) shows good agreement with ice thickness from submarine (ULS), ICESat, and [CryoSat-2](#) in both February/March and October/November [from RK18](#), with low bias and RMSE and a high R-squared, except for a near-zero R-squared with [CryoSat-2](#) in October/November. IceAgeDerived sea ice volume over the Arctic Ocean shows good agreement with that from ICESat and [CryoSat-2](#). Compared to ICESat, it has a low bias and RMSE and a high R-squared in February/March. In October/November it has a high negative bias, low RMSE, and high R-squared. Compared to [CryoSat-2](#), it has low bias, RMSE, and R-squared values in both February/March and October/November.
- [More detailed comparisons with monthly ice thickness from Envisat 2003-2010 and from CryoSat-2 from AWI, CPOM, and NASA GSFC reveal low bias in the IceAgeDerived ice thickness and volume, with great underestimation appear over the area north of the Canadian Archipelago and the Greenland. There are noticeable spreads in the CryoSat-2 ice thickness retrievals and derived ice volume from different products, e.g. AWI, CPOM, and NASA GSFC. The ratios of the ice volume uncertainties to the means are estimated ranging from 21% to 29% over the period 1984 to 2018.](#)
- Sea ice is thickest north of the Canadian Archipelago and Greenland, decreasing radially, with the thinnest ice over the Arctic’s peripheral seas on the Eurasia side of the Arctic Ocean. Sea ice volume over the Arctic Ocean has its minimum value in September, increasing to a maximum value in the following May.
- In both February/March and October/November, the time series of sea ice thickness over DRA from the IceAgeDerived shows a decreasing trend from 1984 to 2000, as does the submarine ULS data, a generally decreasing trend from 2003 to 2008 similar to that of ICESat, and a relatively stable state from 2011 to 2018, like the [CryoSat-2](#) ice thickness.
- Sea ice volume over the Arctic Ocean shows a generally decreasing trend from 1984 to around 2008, and relatively stable conditions afterwards in almost every month. The mean monthly trend of all months from 1984 to 2018 is  $-411 \text{ km}^3/\text{year}$ , which shows a stronger ice volume reduction than PIOMAS ( $-282 \text{ km}^3/\text{year}$ ) and OTIM

Deleted: CryoSat

Deleted: CryoSat

Deleted: CryoSat

Deleted: CryoSat

Deleted:

Deleted: CryoSat

770 (-269 km<sup>3</sup>/year). This difference can be attributed to the higher sea ice volume over the Arctic Ocean from the IceAgeDerived in the 1980s.

- Over the Arctic Ocean, changes in sea ice thickness contribute 80% or more to the sea ice volume trend from 1984 to 2018 from November to May, decreasing to a contribution of about 50% in August and September. The changes in sea ice area contribute less than 30% to the trends in all months, with even lower contributions from November to May.

775 Although the ice thickness and volume dataset presented here is a consistent and accurate multidecadal product, there are some areas for potential improvement. 1) a linear relationship between ice age and ice thickness is assumed, which may not be strictly valid. Of particular interest is the observation that submarine data shows a slightly thinner ice thickness for ice more than four years old than that for four-year old ice, though ICESat shows the same in only one year. To determine whether this

780 relationship is valid, other collocated ice age and ice thickness data, e.g. from the recently launched ICESat-2 (Markus et al. 2017) should be analyzed. 2) the annual cycle of ice thickness growth/melt is assumed to be linear from September to the following May and from May to September, which also may not be valid. RPW08 conceptualized sea ice growth and melt as a sine function. A more sophisticated model of the annual cycle of sea ice growth/melt may be needed in deriving the ice age and ice thickness relationship. The annual cycle of trends in ice volume over the Arctic Ocean appears to be opposite to the annual cycle of ice growth, which suggests that this trend feature may be related to the use of a linear sea ice growth/melt model. How they are related and whether a more sophisticated model would remove this feature requires further investigation.

785 3) in deriving the relation of ice age to ice thickness in the years before 2000, only ice draft measurements from submarine ULS over the DRA, e.g. over or near the central Arctic Ocean, are available. The derived relationship may be skewed to higher ice thicknesses. Thus, Arctic ice volume derived in this study before 2004 might be overestimated. Correcting this relationship requires more spatially representative ice thickness measurements, or a well-designed parameterization scheme. The ice age-thickness relationship is not available for months other than March, and we assumed that such a relationship is the same in

790 October but with an ice thickness of 0.7 m less. With CryoSat-2 ice thickness available from October to April, we can derive the ice age-thickness relationship in all these months, and assess the linear ice thickness growth/melt assumption. 4) although the weekly ice age product is converted to weekly ice thickness and interpolated to daily ice thickness for monthly mean calculation, the daily ice age product lacks detailed temporal and spatial information, and is not intended for direct comparison to point in situ ice thickness or other daily ice thickness products.

795 In general, future improvements in ice thickness estimation may require work on 1) improving our understanding and parameterization of the forcing and physical processes controlling the ice growth and melt, 2) reducing uncertainties in the ancillary data required for ice thickness estimation, 3) collecting extensive temporally and spatially representative ice thickness measurements for better evaluation, 4) designing new models or approaches to estimate ice thickness. More specifically, snow depth over sea ice is one of the key parameters in sea ice thickness retrieval for all existing satellite data sets. Though progress has been made in reducing the uncertainties in estimating snow depth from space, its uncertainty remains high (Lawrence et al. 2018, Shalina et al. 2018). One major challenge for improving sea ice thickness retrievals is the lack of “truth” validation

Deleted: C

Deleted: First

Deleted: Second

Deleted: ,

Deleted: decline

Deleted: decline

Deleted: decline

Deleted: ing

Deleted: applied

Deleted: . This

Deleted: requires further investigation.

Deleted: Third

Deleted: Additionally,

Deleted: in

Deleted: decline

Deleted: we made

Deleted: even

Deleted: . Such

Deleted: content of ice thickness on the daily scale,

Deleted: , such as CryoSat-2

Deleted: F

Deleted: ¶

Deleted: S

Deleted: the

Deleted: the

Deleted:

830 data sets. Because of the severe environmental conditions in the polar regions, in situ ice thickness measurements are scarce, which limits our ability to identify the issues in current data sets and to make further improvement. Ice thickness products using new approaches may provide additional evaluation of existing products. A better overall product benefits from all the above-mentioned efforts, and may come as an ensemble of multiple ice thickness products if we know the limitations and strengths of each data set.

#### 835 **5 Code availability**

Code in Interactive Data Language (IDL) to process the input data, to generate the data sets, and to analyze the data sets is available upon request from Y.L.

#### **6 Data availability**

840 Data used to generate the ice thickness and ice volume data sets are available from the National Snow and Ice Data Center (NSIDC) as detailed in the manuscript. The derived ice thickness and ice volume data sets are available upon request from Y.L.

#### **7 Author contributions**

845 Y.L. and J.K. conceived the idea of this study. Y.L. analysed the data and generated the ice thickness and ice volume data sets, analysed the results, and wrote the manuscript with contributions from all the co-authors. J.K. provided valuable guidance on the work and editing of the manuscript. X.W. provided and advised on the usage of the OTIM ice thickness. M.T. advised on the usage of the ice age data. All authors assisted in writing, editing, and revising the manuscript.

Deleted: and

#### **8 Competing interests**

The authors declare that they have no competing interests.

#### **9 Acknowledgments**

850 This work was supported by the NOAA National Centers for Environmental Information (NCEI) Climate Data Records Program and the Joint Polar Satellite System (JPSS) Program Office. Y.L. would like to thank Ms. Leanne Avila for editing the manuscript. The views, opinions, and findings contained in this report are those of the author(s) and should not be construed as an official National Oceanic and Atmospheric Administration or U.S. Government position, policy, or decision.

Deleted: Climatic Data

Deleted: DC



## References

- 860 [Cavalieri, D. J., C. L. Parkinson, P. Gloersen, and H. J. Zwally. updated yearly. Sea Ice Concentrations from Nimbus-7 SMMR and DMSP SSM/I-SSMIS Passive Microwave Data, Version 1. Boulder, Colorado USA. NASA National Snow and Ice Data Center Distributed Active Archive Center. doi: <https://doi.org/10.5067/8GQ8LZQVL0VL>. \[Date Accessed in January 2019\]](#), 1996.
- Gregory, J. M., Stott, P. A., Cresswell, D. J., Rayner, N. A., Gordon, C., and Sexton, D. M. H.: Recent and future changes in Arctic sea ice simulated by the HadCM3 AOGCM, *Geophysical Research Letters*, 29, 28-21, 2002.
- Ivanova, N., Pedersen, L. T., Tonboe, R. T., Kern, S., Heygster, G., Lavergne, T., Sørensen, A., Saldo, R., Dybkjær, G., and 865 Brucker, L.: Inter-comparison and evaluation of sea ice algorithms: towards further identification of challenges and optimal approach using passive microwave observations, *The Cryosphere*, 9, 1797-1817, 2015.
- [Hendricks, S., and Ricker, R.: Product User Guide & Algorithm Specification: AWI CryoSat-2 Sea Ice Thickness \(version 2.2. <https://epic.awi.de/id/eprint/50033/1/AWI-CryoSat2-ProductUserGuide-v2p2.pdf>\). 2019.](#)
- 870 Key, J., Wang, X., Liu, Y., Dworak, R., and Letterly, A.: The AVHRR Polar Pathfinder Climate Data Records, *Remote Sensing*, 8, 167, 2016.
- Kurtz, N. T., Galin, N., and Studinger, M.: An improved [CryoSat-2](#) sea ice freeboard retrieval algorithm through the use of waveform fitting, *The Cryosphere*, 8, 1217-1237, 2014.
- [Kurtz, N. and J. Harbeck. 2017: \[CryoSat-2 Level-4 Sea Ice Elevation, Freeboard, and Thickness, Version 1. \\[2011-2018\\]. Boulder, Colorado USA. NASA National Snow and Ice Data Center Distributed Active Archive Center. doi:<https://doi.org/10.5067/96J00KIFDAS8>. \\[Data accessed in November 2019\\]\]\(#\)](#)
- 875 Kwok, R., and Cunningham, G. F.: ICESat over Arctic sea ice: Estimation of snow depth and ice thickness, *Journal of Geophysical Research: Oceans*, 113, 2008.
- Kwok, R., and Rothrock, D. A.: Decline in Arctic sea ice thickness from submarine and ICESat records: 1958–2008, *Geophysical Research Letters*, 36, 2009.
- 880 Kwok, R.: Arctic sea ice thickness, volume, and multiyear ice coverage: losses and coupled variability (1958–2018), *Environmental Research Letters*, 13, 105005, 2018.
- [Haas, C., Beckers, J., King, J., Silis, A., Stroeve, J., Wilkinson, J., Notenboom, B., Schweiger, A., and Hendricks, S.: Ice and snow thickness variability and change in the high Arctic Ocean observed by in situ measurements, \*Geophysical Research Letters\*, 44, 10-462, 2017.](#)
- 885 Lawrence, I. R., Tsamados, M. C., Stroeve, J. C., Armitage, T. W. K., and Ridout, A. L.: Estimating snow depth over Arctic sea ice from calibrated dual-frequency radar freeboards, *The Cryosphere*, 12, 3551-3564, 2018.
- Laxon, S. W., Giles, K. A., Ridout, A. L., Wingham, D. J., Willatt, R., Cullen, R., Kwok, R., Schweiger, A., Zhang, J., and Haas, C.: [CryoSat-2](#) estimates of Arctic sea ice thickness and volume, *Geophysical Research Letters*, 40, 732-737, 2013.

**Deleted:** Aman, A. A. and Bman, B. B.: The test article, *J. Sci. Res.*, 12, 135–147, doi:10.1234/56789, 2015. Aman, A. A., Cman, C., and Bman, B. B.: More test articles, *J. Adv. Res.*, 35, 13–28, doi:10.2345/67890, 2014.

**Formatted:** Reference

**Formatted:** Reference

**Formatted:** Reference

**Deleted:** CryoSat

**Formatted:** Font: Not Italic, Complex Script Font: Not Italic

**Deleted:** e

**Deleted:** A

**Formatted:** Reference

**Deleted:** CryoSat

- Letterly, A., Key, J., and Liu, Y.: Arctic climate: changes in sea ice extent outweigh changes in snow cover, *The Cryosphere*, 12, 3373-3382, 2018.
- Lindsay, R., Haas, C., Hendricks, S., Hunkeler, P., Kurtz, N., Paden, J., Panzer, B., Sonntag, J., Yungel, J., and Zhang, J.: Seasonal forecasts of Arctic sea ice initialized with observations of ice thickness, *Geophysical research letters*, 39, 2012.
- 900 Liu, Y., Key, J., and Wang, X.: Influence of changes in sea ice concentration and cloud cover on recent Arctic surface temperature trends, *Geophysical Research Letters*, 36, 10.1029/2009GL040708, 2009.
- Liu, Y., Key, J., and Mahoney, R.: Sea and Freshwater Ice Concentration from VIIRS on Suomi NPP and the Future JPSS Satellites, *Remote Sensing*, 8, 523, 2016.
- 905 Markus, T., Neumann, T., Martino, A., Abdalati, W., Brunt, K., Csatho, B., Farrell, S., Fricker, H., Gardner, A., and Harding, D.: The Ice, Cloud, and land Elevation Satellite-2 (ICESat-2): science requirements, concept, and implementation, *Remote sensing of environment*, 190, 260-273, 2017.
- Maslanik, J., Stroeve, J., Fowler, C., and Emery, W.: Distribution and trends in Arctic sea ice age through spring 2011, *Geophysical Research Letters*, 38, 2011.
- 910 Maslanik, J. A., Fowler, C., Stroeve, J., Drobot, S., Zwally, J., Yi, D., and Emery, W.: A younger, thinner Arctic ice cover: Increased potential for rapid, extensive sea-ice loss, *Geophysical Research Letters*, 34, 2007.
- National Snow and Ice Data Center (comp.). updated 2006. Submarine Upward Looking Sonar Ice Draft Profile Data and Statistics, Version 1. [Indicate subset used]. Boulder, Colorado USA. NSIDC: National Snow and Ice Data Center. doi: <https://doi.org/10.7265/N54Q7RWK>. [Date Accessed January 2019], 1998.
- 915 Perovich, D. K., Nghiem, S. V., Markus, T., and Schweiger, A.: Seasonal evolution and interannual variability of the local solar energy absorbed by the Arctic sea ice–ocean system, *Journal of Geophysical Research: Oceans*, 112, 2007.
- Pistone, K., Eisenman, I., and Ramanathan, V.: Observational determination of albedo decrease caused by vanishing Arctic sea ice, *Proceedings of the National Academy of Sciences*, 111, 3322-3326, 2014.
- Rothrock, D. A., Yu, Y., and Maykut, G. A.: Thinning of the Arctic sea-ice cover, *Geophysical Research Letters*, 26, 3469-3472, 1999.
- 920 Rothrock, D. A., and Wensnahan, M.: The accuracy of sea ice drafts measured from US Navy submarines, *Journal of Atmospheric and Oceanic Technology*, 24, 1936-1949, 2007.
- Rothrock, D. A., Percival, D. B., and Wensnahan, M.: The decline in arctic sea-ice thickness: Separating the spatial, annual, and interannual variability in a quarter century of submarine data, *Journal of Geophysical Research: Oceans*, 113, 2008.
- 925 Schweiger, A. J., Wood, K. R., and Zhang, J.: Arctic sea ice volume variability over 1901–2010: A model-based reconstruction, *Journal of Climate*, 32, 4731-4752, 2019.
- Schweiger, A., Lindsay, R., Zhang, J., Steele, M., Stern, H., and Kwok, R.: Uncertainty in modeled Arctic sea ice volume, *Journal of Geophysical Research: Oceans*, 116, 2011.
- Screen, J. A., and Simmonds, I.: The central role of diminishing sea ice in recent Arctic temperature amplification, *Nature*, 464, 1334, 2010.
- 930

- Shalina, E. V., and Sandven, S.: Snow depth on Arctic sea ice from historical in situ data, *The Cryosphere*, 12, 1867-1886, 2018.
- [Smedsrud, L., Sirevaag, A., Kloster, K., Sorteberg, A., and Sandven, S.: Recent wind driven high sea ice export in the Fram Strait contributes to Arctic sea ice decline. \*The Cryosphere Discuss.\* 5, 1311-1334, 2011a.](#)
- 935 [Solomon, S., Manning, M., Marquis, M., and Qin, D.: Climate change 2007-the physical science basis: Working group I contribution to the fourth assessment report of the IPCC, Cambridge university press, 2007.](#)
- Stroeve, J., Holland, M. M., Meier, W., Scambos, T., and Serreze, M.: Arctic sea ice decline: Faster than forecast, *Geophysical research letters*, 34, 2007.
- Stroeve, J., Barrett, A., Serreze, M., and Schweiger, A.: Using records from submarine, aircraft and satellites to evaluate  
940 climate model simulations of Arctic sea ice thickness, *Cryosphere*, 8, 2014.
- Stroeve, J. C., Serreze, M. C., Holland, M. M., Kay, J. E., Maslanik, J., and Barrett, A. P.: The Arctic's rapidly shrinking sea ice cover: a research synthesis, *Climatic Change*, 110, 1005-1027, 2012.
- Sévellec, F., Fedorov, A. V., and Liu, W.: Arctic sea-ice decline weakens the Atlantic meridional overturning circulation, *Nature Climate Change*, 7, 604, 2017.
- 945 Tian-Kunze, X., Kaleschke, L., Maaß, N., Mäkynen, M., Serra, N., Drusch, M., and Krumpfen, T.: SMOS-derived thin sea ice thickness: algorithm baseline, product specifications and initial verification, *The Cryosphere*, 8, 997-1018, 2014.
- [Tilling, R. L., Ridout, A., and Shepherd, A.: Estimating Arctic sea ice thickness and volume using CryoSat-2 radar altimeter data. \*Advances in Space Research.\* 62, 1203-1225, 2018.](#)
- Tschudi, M., Stroeve, J., and Stewart, J.: Relating the age of Arctic sea ice to its thickness, as measured during NASA's ICESat  
950 and IceBridge campaigns, *Remote Sensing*, 8, 457, 2016.
- Tschudi, M. A., Meier, W. N., and Stewart, J. S.: An enhancement of sea ice motion and age products, *The Cryosphere Discussion*, 2019a, <https://www.the-cryosphere-discuss.net/tc-2019-40/>.
- Tschudi, M., W. N. Meier, J. S. Stewart, C. Fowler, and J. Maslanik. 2019. *EASE-Grid Sea Ice Age, Version 4*. Boulder, Colorado USA. NASA National Snow and Ice Data Center Distributed Active Archive Center. doi:  
955 <https://doi.org/10.5067/UTAV7490FEPB>. [Data Accessed in May 2019], 2019b.
- Wang, X., Key, J. R., and Liu, Y.: A thermodynamic model for estimating sea and lake ice thickness with optical satellite data, *Journal of Geophysical Research: Oceans*, 115, 2010.
- Wang, X., Key, J., Kwok, R., and Zhang, J.: Comparison of Arctic sea ice thickness from satellites, aircraft, and PIOMAS data, *Remote Sensing*, 8, 713, 2016.
- 960 Zhang, J., and Rothrock, D. A.: Modeling global sea ice with a thickness and enthalpy distribution model in generalized curvilinear coordinates, *Monthly Weather Review*, 131, 845-861, 2003.

Formatted: Reference

Commented [m3]: This paper is still in review, but has a DOI, so up to you if you want to reference it.

Deleted: .

965 **Table 1.** Statistics of comparison of ice thickness from IceAgeDerived, PIOMAS, and OTIM and from submarine upward-looking sonar 1984-2000, ICESat 2004-2008, and CryoSat-2 2011-2018 in February/March (top row), and October/November (bottom row) over the SCICEX data release area. Correlation squared with higher than 95% confidence level is in bold.

| Ice thickness |             | Submarine up-<br>looking sonar 1984-<br>2000 | ICESat<br>2004-2008  | CryoSat-2<br>2011-2018 |
|---------------|-------------|----------------------------------------------|----------------------|------------------------|
|               |             | Feb/Mar<br>(Oct/Nov)                         | Feb/Mar<br>(Oct/Nov) | Feb/Mar<br>(Oct/Nov)   |
| IceAgeDerived | Bias (m)    | 0.03                                         | -0.014               | -0.21                  |
|               |             | -0.035                                       | 0.20                 | -0.04                  |
|               | RMSE<br>(m) | 0.074                                        | 0.096                | 0.079                  |
|               |             | 0.14                                         | 0.16                 | 0.14                   |
| $R^2$         | <b>0.97</b> | <b>0.75</b>                                  | <b>0.65</b>          |                        |
|               | <b>0.99</b> | <b>0.93</b>                                  | <b>0.037</b>         |                        |
| PIOMAS        | Bias (m)    | -0.16                                        | 0.12                 | -0.10                  |
|               |             | -0.055                                       | 0.14                 | -0.24                  |
|               | RMSE<br>(m) | 0.31                                         | 0.16                 | 0.13                   |
|               |             | 0.30                                         | 0.097                | 0.16                   |
| $R^2$         | <b>0.50</b> | <b>0.32</b>                                  | <b>0.079</b>         |                        |
|               | <b>0.61</b> | <b>0.94</b>                                  | <b>0.031</b>         |                        |

- Formatted ... [7]
- Deleted: 1...: Statistics of comparison of ice thickness over the [8]
- Deleted: ing ... [13]
- Formatted ... [18]
- Formatted ... [15]
- Formatted ... [19]
- Formatted ... [16]
- Formatted ... [12]
- Formatted ... [9]
- Formatted ... [11]
- Formatted Table ... [10]
- Formatted ... [20]
- Formatted ... [17]
- Formatted ... [14]
- Formatted ... [23]
- Formatted ... [25]
- Formatted ... [27]
- Formatted ... [22]
- Formatted ... [24]
- Formatted ... [26]
- Formatted ... [28]
- Formatted ... [30]
- Formatted ... [32]
- Formatted ... [34]
- Formatted ... [29]
- Formatted ... [21]
- Formatted ... [31]
- Formatted ... [33]
- Formatted ... [35]
- Formatted ... [37]
- Formatted ... [39]
- Formatted ... [41]
- Formatted ... [36]
- Formatted ... [38]
- Formatted ... [40]
- Formatted ... [42]
- Formatted ... [45]
- Formatted ... [47]
- Formatted ... [49]
- Formatted ... [44]
- Formatted ... [46]
- Formatted ... [48]
- Formatted ... [50]
- Formatted ... [52]
- Formatted ... [54]
- Formatted ... [56]
- Formatted ... [51]
- Formatted ... [43]
- Formatted ... [53]
- Formatted ... [55]
- Formatted ... [57]
- Formatted ... [59]
- Formatted ... [61]
- Formatted ... [63]
- Formatted ... [58]
- Formatted ... [60]
- Formatted ... [62]

|      |                |       |       |       |
|------|----------------|-------|-------|-------|
| OTIM | Bias (m)       | 0.16  | 0.49  | 0.21  |
|      |                | -0.60 | -0.13 | -0.37 |
|      | RMSE           | 0.26  | 0.16  | 0.21  |
|      |                | (m)   | 0.28  | 0.22  |
|      | R <sup>2</sup> | 0.73  | 0.30  | 0.41  |
|      |                | 0.87  | 0.95  | 0.42  |

Formatted ... [67]  
Formatted ... [69]  
Formatted ... [71]  
Formatted ... [66]  
Formatted ... [68]  
Formatted ... [70]  
Formatted ... [72]  
Formatted ... [74]  
Formatted ... [76]  
Formatted ... [78]  
Formatted ... [73]  
Formatted ... [65]  
Formatted ... [75]  
Formatted ... [77]  
Formatted ... [79]  
Formatted ... [81]  
Formatted ... [83]  
Formatted ... [85]  
Formatted ... [80]  
Formatted ... [82]  
Formatted ... [84]  
Formatted ... [86]

**Table 2.** Statistics of comparison of Arctic ice volume from IceAgeDerived, PIOMAS, and OTIM to ICESat 2004-2008, and CryoSat-2 2011-2018 in February/March (top row), and October/November (bottom row) over the Arctic Ocean. Correlation squared with higher than 95% confidence level is in bold.

| Ice volume     |                                         | ICESat               | CryoSat-2            |
|----------------|-----------------------------------------|----------------------|----------------------|
|                |                                         | 2004-2008            | 2011-2018            |
|                |                                         | Feb/Mar<br>(Oct/Nov) | Feb/Mar<br>(Oct/Nov) |
| IceAgeDerived  | Bias (10 <sup>3</sup> km <sup>3</sup> ) | -0.72                | 0.29                 |
|                |                                         | -3.95                | -0.66                |
|                | RMSE (10 <sup>3</sup> km <sup>3</sup> ) | 0.74                 | 0.75                 |
|                |                                         | 0.76                 | 0.98                 |
| R <sup>2</sup> | <b>0.87</b>                             | <b>0.28</b>          |                      |
|                | <b>0.95</b>                             | <b>0.051</b>         |                      |
| PIOMAS         | Bias (10 <sup>3</sup> km <sup>3</sup> ) | 0.44                 | 0.90                 |
|                |                                         | -4.21                | -1.70                |
|                | RMSE (10 <sup>3</sup> km <sup>3</sup> ) | 0.98                 | 0.96                 |
|                |                                         | 0.68                 | 0.98                 |
| R <sup>2</sup> | <b>0.64</b>                             | <b>0.14</b>          |                      |
|                | <b>0.93</b>                             | <b>0.19</b>          |                      |

- Deleted: 2
- Formatted ... [87]
- Deleted: and from
- Deleted: Cryosat
- Deleted: Cryosat
- Formatted ... [95]
- Formatted ... [92]
- Formatted ... [96]
- Formatted ... [93]
- Formatted ... [91]
- Formatted ... [88]
- Formatted Table ... [89]
- Deleted: thickness
- Formatted ... [90]
- Formatted ... [97]
- Formatted ... [94]
- Formatted ... [100]
- Formatted ... [102]
- Formatted ... [99]
- Formatted ... [101]
- Formatted ... [103]
- Formatted ... [105]
- Formatted ... [107]
- Formatted ... [104]
- Formatted ... [98]
- Formatted ... [106]
- Formatted ... [108]
- Formatted ... [110]
- Formatted ... [112]
- Formatted ... [109]
- Formatted ... [111]
- Formatted ... [113]
- Formatted ... [116]
- Formatted ... [118]
- Formatted ... [115]
- Formatted ... [117]
- Formatted ... [119]
- Formatted ... [121]
- Formatted ... [123]
- Formatted ... [120]
- Formatted ... [114]
- Formatted ... [122]
- Formatted ... [124]
- Formatted ... [126]
- Formatted ... [128]
- Formatted ... [125]
- Formatted ... [127]
- Formatted ... [129]

|      |                                         |       |       |
|------|-----------------------------------------|-------|-------|
| OTIM | Bias (10 <sup>3</sup> km <sup>3</sup> ) | 4.20  | 3.87  |
|      |                                         | -4.86 | -1.63 |
|      | RMSE (10 <sup>3</sup> km <sup>3</sup> ) | 1.20  | 1.48  |
|      |                                         | 0.96  | 1.23  |
|      | R <sup>2</sup>                          | 0.38  | 0.011 |
|      |                                         | 0.96  | 0.012 |

Formatted: Font: (Default) +Body (Times New Roman), Complex Script Font: +Body (Times New Roman), 10 pt

Formatted: Font: (Default) +Body (Times New Roman), 10 pt, Font color: Auto, Complex Script Font: +Body (Times New Roman), 10 pt

Formatted: Font: (Default) +Body (Times New Roman), Complex Script Font: +Body (Times New Roman), 10 pt

Formatted: Font: (Default) +Body (Times New Roman), 10 pt, Font color: Auto, Complex Script Font: +Body (Times New Roman), 10 pt

Formatted: Font: (Default) +Body (Times New Roman), Complex Script Font: +Body (Times New Roman), 10 pt

Formatted: Font: (Default) +Body (Times New Roman), 10 pt, Font color: Auto, Complex Script Font: +Body (Times New Roman), 10 pt

Formatted: Font: (Default) +Body (Times New Roman), Complex Script Font: +Body (Times New Roman), 10 pt

Formatted ... [132]

Formatted ... [133]

Formatted ... [134]

Formatted ... [137]

Formatted ... [138]

Formatted ... [141]

Formatted ... [142]

Formatted ... [135]

Formatted ... [130]

Formatted ... [131]

Formatted ... [136]

Formatted ... [139]

Formatted ... [140]

Formatted ... [143]

Formatted ... [144]

Formatted ... [147]

Formatted ... [148]

Formatted ... [151]

Formatted ... [152]

Formatted ... [145]

Formatted ... [146]

Formatted ... [149]

Formatted ... [150]

Formatted ... [153]

Formatted ... [154]

- Formatted ... [155]
- Deleted: Cryosat
- Formatted ... [156]
- Formatted ... [157]
- Formatted ... [160]
- Formatted ... [162]
- Formatted ... [158]
- Formatted Table ... [159]
- Formatted ... [161]
- Formatted ... [164]
- Formatted ... [165]
- Formatted ... [166]
- Formatted ... [167]
- Formatted ... [168]
- Formatted ... [169]
- Formatted ... [170]
- Formatted ... [171]
- Formatted ... [172]
- Formatted ... [173]
- Formatted ... [174]
- Formatted ... [175]
- Formatted ... [176]
- Formatted ... [177]
- Formatted ... [178]
- Formatted ... [179]
- Deleted: Cryosat
- Formatted ... [180]
- Formatted ... [181]
- Formatted ... [182]
- Formatted ... [183]
- Formatted ... [184]
- Formatted ... [185]
- Formatted ... [163]
- Formatted ... [186]
- Formatted ... [187]
- Formatted ... [188]
- Formatted ... [189]
- Formatted ... [190]
- Formatted ... [191]
- Formatted ... [192]
- Formatted ... [193]
- Formatted ... [194]
- Formatted ... [195]
- Formatted ... [197]
- Formatted ... [198]
- Formatted ... [199]
- Formatted ... [200]
- Deleted: thickness...olume of IceAgeDerived and Cryosat... [196]
- Formatted ... [201]
- Formatted ... [202]
- Formatted ... [203]
- Formatted ... [204]
- Formatted ... [205]
- Formatted ... [206]
- Formatted ... [207]
- Formatted ... [208]
- Formatted ... [209]
- Formatted ... [210]
- Formatted ... [211]

**Table 3.** Differences of monthly ice thickness and ice volume between IceAgeDerived and CryoSat-2.

|                                                                                                              |          | AWI             | NASA<br>GSFC    | CPOM            |
|--------------------------------------------------------------------------------------------------------------|----------|-----------------|-----------------|-----------------|
| Comparison of monthly ice thickness of IceAgeDerived and CryoSat-2, 2011-2018 mean (standard deviation) in m | Mean     | -0.02<br>(0.11) | -0.27<br>(0.15) | -0.18<br>(0.09) |
|                                                                                                              | January  | 0.02 (0.09)     | -0.24<br>(0.12) | -0.17<br>(0.08) |
|                                                                                                              | February | -0.03<br>(0.11) | -0.27<br>(0.13) | -0.21<br>(0.10) |
|                                                                                                              | March    | -0.06<br>(0.09) | -0.30<br>(0.11) | -0.24<br>(0.07) |
|                                                                                                              | April    | -0.03<br>(0.08) | -0.14<br>(0.11) | -0.14<br>(0.06) |
|                                                                                                              | October  | 0.00 (0.16)     | -0.27<br>(0.22) | -0.14<br>(0.12) |
|                                                                                                              | November | -0.03<br>(0.12) | -0.35<br>(0.14) | -0.19<br>(0.11) |
|                                                                                                              | December | 0.01 (0.10)     | -0.29<br>(0.14) | -0.18<br>(0.09) |
| Comparison of monthly ice volume of IceAgeDerived and CryoSat-2, 2011-2018 mean (standard deviation) in      | Mean     | -0.76<br>(0.86) | -1.79<br>(0.95) | -0.98<br>(0.81) |
|                                                                                                              | January  | -0.46<br>(0.64) | -1.89<br>(0.80) | -0.95<br>(0.51) |
|                                                                                                              | February | -1.03<br>(0.87) | -2.12<br>(0.94) | -1.35<br>(0.68) |
|                                                                                                              | March    | -1.61<br>(0.74) | -2.39<br>(0.76) | -1.79<br>(0.68) |



|                                      |                 |               |               |               |
|--------------------------------------|-----------------|---------------|---------------|---------------|
| <u>10<sup>3</sup> km<sup>3</sup></u> | <u>April</u>    | <u>-1.38</u>  | <u>-1.37</u>  | <u>-1.35</u>  |
|                                      |                 | <u>(0.59)</u> | <u>(0.83)</u> | <u>(0.55)</u> |
|                                      | <u>October</u>  | <u>-0.11</u>  | <u>-0.68</u>  | <u>-0.05</u>  |
|                                      |                 | <u>(0.66)</u> | <u>(0.73)</u> | <u>(0.66)</u> |
|                                      | <u>November</u> | <u>-0.46</u>  | <u>-1.94</u>  | <u>-0.80</u>  |
|                                      |                 | <u>(0.76)</u> | <u>(0.87)</u> | <u>(0.71)</u> |
|                                      | <u>December</u> | <u>-0.35</u>  | <u>-1.79</u>  | <u>-0.98</u>  |
|                                      |                 | <u>(0.75)</u> | <u>(0.95)</u> | <u>(0.81)</u> |

- Formatted:** Font: 10 pt, Complex Script Font: Times New Roman, 10 pt
- Formatted:** Font: 10 pt, Complex Script Font: Times New Roman, 10 pt
- Formatted:** Font: 10 pt, Complex Script Font: Times New Roman, 10 pt
- Formatted:** Font: 10 pt, Complex Script Font: Times New Roman, 10 pt
- Formatted:** Font: 10 pt, Complex Script Font: Times New Roman, 10 pt
- Formatted:** Font: 10 pt, Complex Script Font: Times New Roman, 10 pt
- Formatted:** Font: 10 pt, Complex Script Font: Times New Roman, 10 pt
- Formatted:** Font: 10 pt, Complex Script Font: Times New Roman, 10 pt
- Formatted:** Font: 10 pt, Complex Script Font: Times New Roman, 10 pt
- Formatted:** Font: 10 pt, Complex Script Font: Times New Roman, 10 pt
- Formatted:** Font: 10 pt, Complex Script Font: Times New Roman, 10 pt
- Formatted:** Font: 10 pt, Complex Script Font: Times New Roman, 10 pt
- Formatted:** Font: 10 pt, Complex Script Font: Times New Roman, 10 pt
- Formatted:** Font: 10 pt, Complex Script Font: Times New Roman, 10 pt
- Formatted:** Font: 10 pt, Complex Script Font: Times New Roman, 10 pt
- Formatted:** Font: 10 pt, Complex Script Font: Times New Roman, 10 pt
- Formatted:** Font: 10 pt, Complex Script Font: Times New Roman, 10 pt
- Formatted:** Font: 10 pt, Complex Script Font: Times New Roman, 10 pt

**Table 4.** Comparison of monthly ice thickness and ice volume between IceAgeDerived and Envisat.

|                                                                                                                                       |          | AWI          |
|---------------------------------------------------------------------------------------------------------------------------------------|----------|--------------|
| Comparison of monthly ice thickness of IceAgeDerived and Envisat, 2003-2010 mean (standard deviation) in m                            | Mean     | 0.07 (0.10)  |
|                                                                                                                                       | January  | 0.08 (0.06)  |
|                                                                                                                                       | February | -0.00 (0.06) |
|                                                                                                                                       | March    | -0.00 (0.06) |
|                                                                                                                                       | April    | 0.04 (0.05)  |
|                                                                                                                                       | October  | 0.24 (0.11)  |
|                                                                                                                                       | November | 0.06 (0.05)  |
|                                                                                                                                       | December | 0.05 (0.05)  |
| Comparison of monthly ice volume of IceAgeDerived and Envisat, 2003-2010 mean (standard deviation) in 10 <sup>3</sup> km <sup>3</sup> | Mean     | -0.08 (0.57) |
|                                                                                                                                       | January  | 0.05 (0.34)  |
|                                                                                                                                       | February | -0.23 (0.28) |
|                                                                                                                                       | March    | -0.84 (0.44) |
|                                                                                                                                       | April    | 0.67 (0.24)  |
|                                                                                                                                       | October  | 0.23 (0.23)  |
|                                                                                                                                       | November | 0.13 (0.31)  |
|                                                                                                                                       | December | -0.09 (0.57) |

- Formatted ... [213]
- Formatted ... [214]
- Deleted: Cryosat-2
- Formatted ... [215]
- Formatted ... [218]
- Formatted ... [216]
- Formatted Table ... [217]
- Formatted ... [221]
- Formatted ... [222]
- Formatted ... [223]
- Formatted ... [224]
- Formatted ... [219]
- Formatted ... [225]
- Formatted ... [226]
- Formatted ... [227]
- Formatted ... [228]
- Deleted: S
- Formatted ... [220]
- Formatted ... [229]
- Formatted ... [230]
- Formatted ... [231]
- Formatted ... [232]
- Formatted ... [233]
- Formatted ... [234]
- Formatted ... [235]
- Formatted ... [236]
- Formatted ... [240]
- Formatted ... [241]
- Formatted ... [242]
- Formatted ... [243]
- Formatted ... [237]
- Formatted ... [244]
- Formatted ... [245]
- Deleted: thickness
- Formatted ... [238]
- Formatted ... [246]
- Formatted ... [247]
- Deleted: S
- Formatted ... [239]
- Formatted ... [248]
- Formatted ... [249]
- Formatted ... [250]
- Formatted ... [251]
- Formatted ... [252]
- Formatted ... [253]
- Formatted ... [254]
- Formatted ... [255]

1020

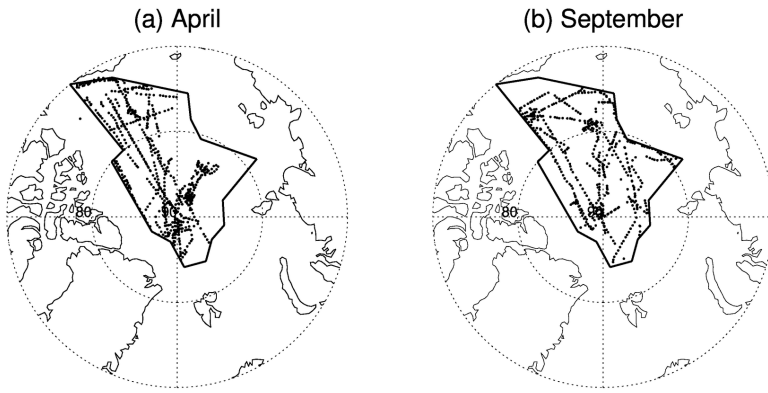

**Figure 1:** U.S. submarine sea ice draft observations in April (a) and September (b) over the Arctic Ocean from 1984 to 2000. [The irregular polygon outlines the SCICEX data release area.](#)

1025

(a) April

**Deleted:**

**Formatted:** Font: Bold, Complex Script Font: Not Bold

**Deleted:** ing

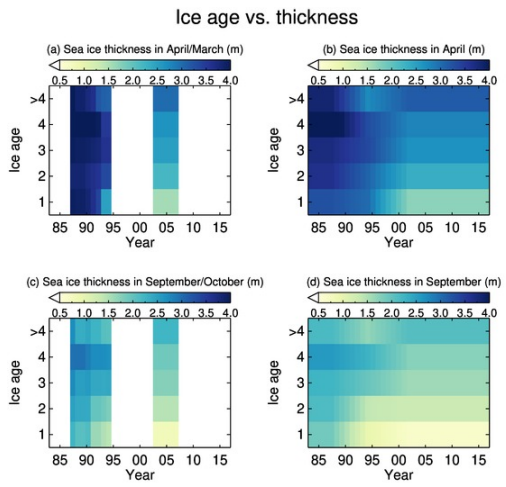

030 **Figure 2:** Observed relationship of ice age and ice thickness from 1988 to 1995 from submarine data in April (a) and September (c), and from 2004 to 2008 from ICESat in March (a) and October (c), and derived relationship of ice age and ice thickness from 1984 to 2018 in April (b) and September (d).

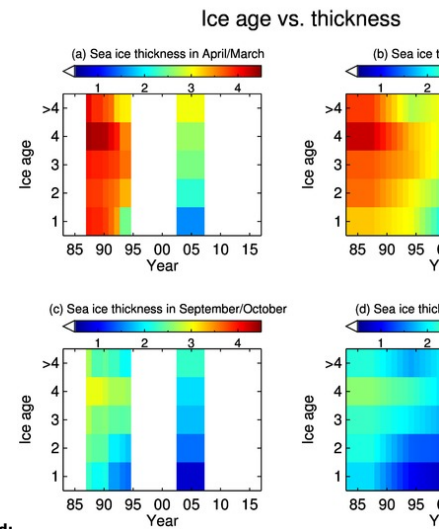

Deleted:

Formatted: Font: Bold, Complex Script Font: Not Bold

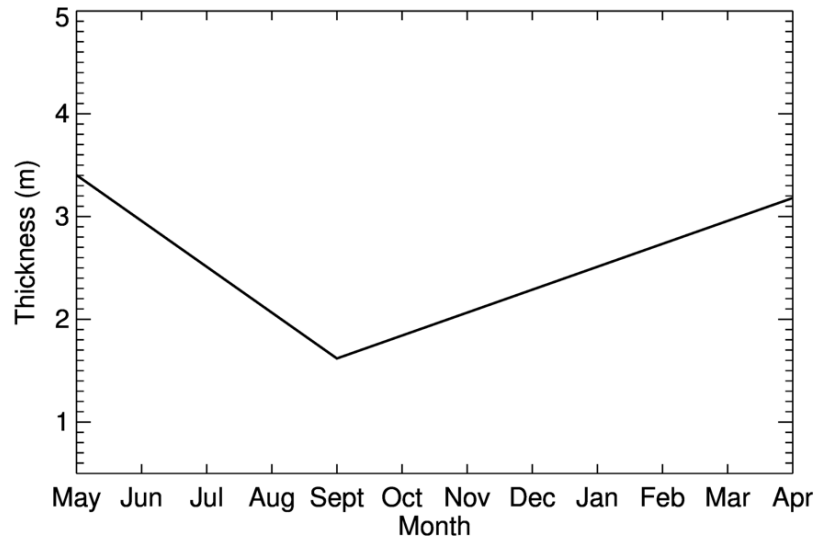

Figure 3: Assumed annual cycle of sea ice thickness for monthly interpolation.

Formatted: Font: Bold, Complex Script Font: Not Bold

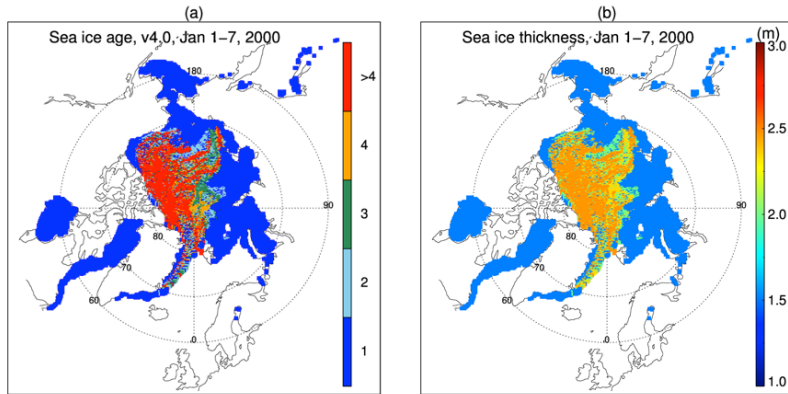

040 Figure 4: Ice age and ice thickness derived from ice age January 1-7, 2000.

**Formatted:** Font: Bold, Complex Script Font: Not Bold

**Deleted:** from

**Deleted:** to

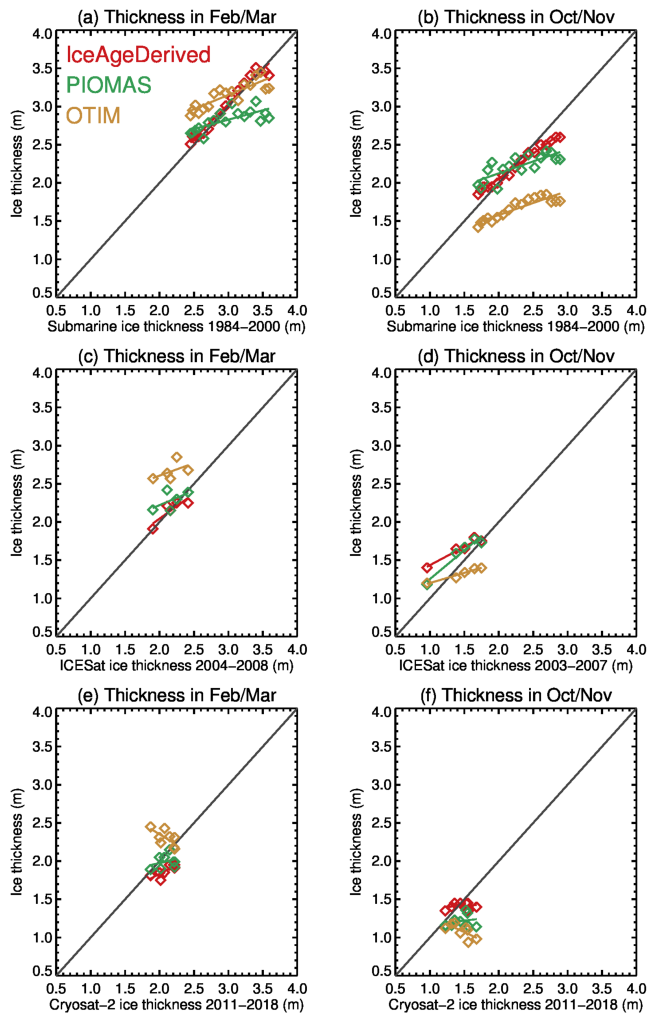

045 **Figure 5.** Comparison of ice thickness from IceAgeDerived, PIOMAS, and OTIM and from submarine up-looking sonar 1984-2000, ICESat 2004-2008, and CryoSat-2 2011-2018 over the SCICEX data release area.

**Formatted:** Font: Bold, Complex Script Font: Not Bold

**Deleted:** over the SCICEX box

**Deleted:** Cryosat

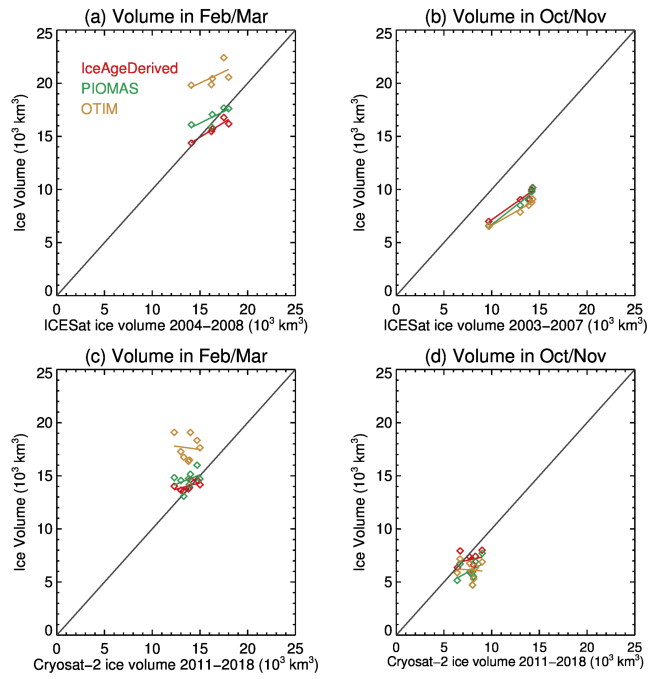

Figure 6: Comparison of [monthly ice volume](#) from IceAgeDerived, PIOMAS, and OTIM and from ICESat 2004-2008, and [CryoSat-2 2011-2018](#) over the Arctic Ocean.

**Formatted:** Font: Bold, Complex Script Font: Not Bold

**Deleted:** ice

**Deleted:** thickness over the SCIEX box

**Deleted:** Cryosat

1050



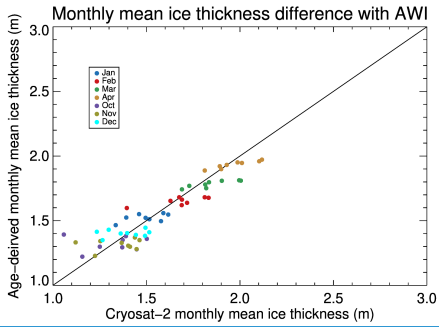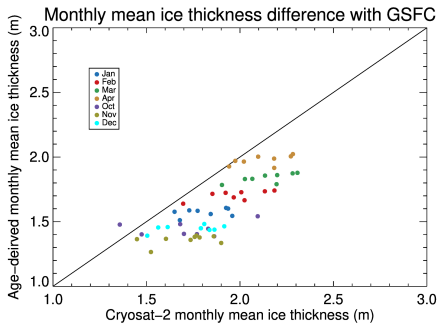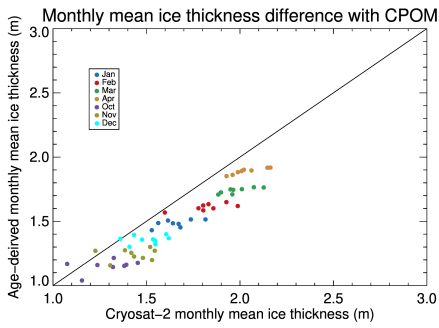

060 [Figure 7. Scatter plot of IceAgeDerived and CryoSat-2 monthly mean ice thickness from \(top\) AWI \(middle\) NASA GSFC, and \(bottom\) CPOM.](#)

**Formatted:** Font: Bold, Complex Script Font: Not Bold

**Formatted:** Caption, Automatically adjust right indent when grid is defined, Space After: 0 pt, Widow/Orphan control, Adjust space between Latin and Asian text, Adjust space between Asian text and numbers, Tab stops: Not at 0.15" + 0.5"

**Deleted:** ing

**Deleted:** and Cryosat-2 monthly mean ice thickness

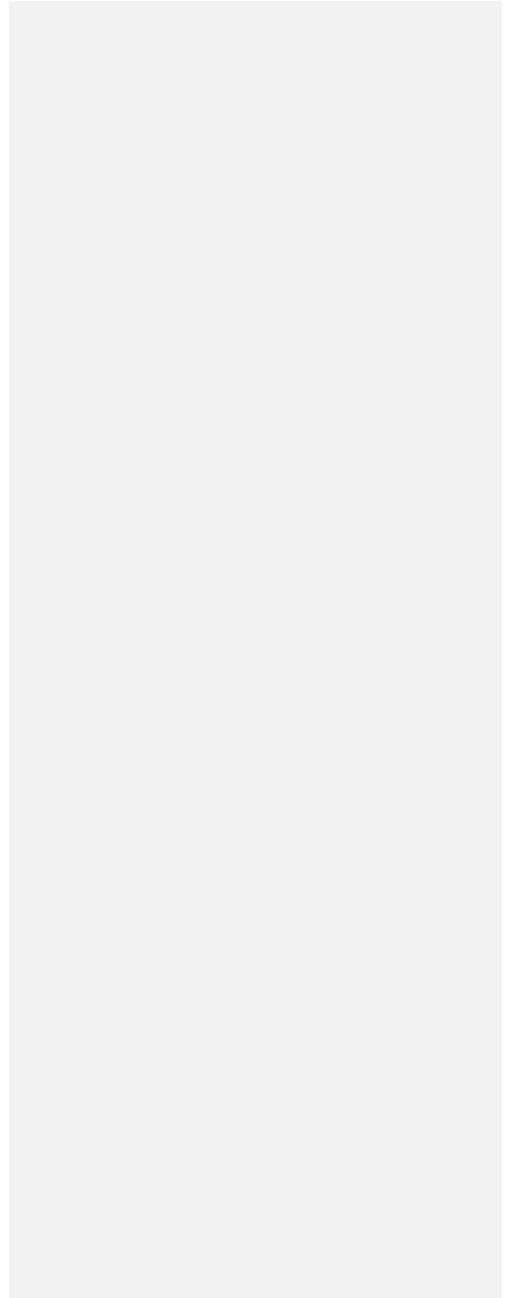

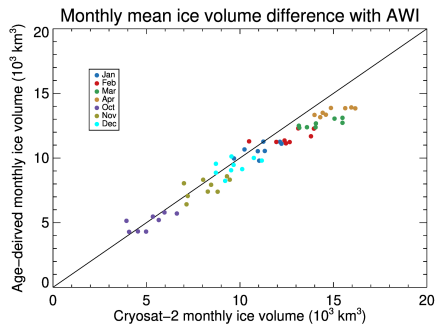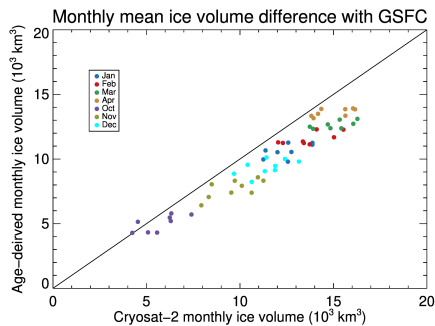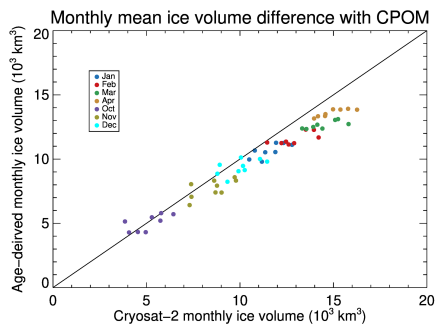

Figure 8. Scatter plot of IceAgeDerived and CryoSat-2 monthly ice volume from (top) AWI, (middle) NASA GSFC, and (bottom) CPOM.

- Deleted: ing
- Deleted: and Cryosat-2 monthly ice volume
- Formatted: Font: Bold, Complex Script Font: Not Bold
- Formatted: Caption
- Formatted: Font: Not Bold
- Formatted: Font: Not Bold
- Formatted: Font: Not Bold

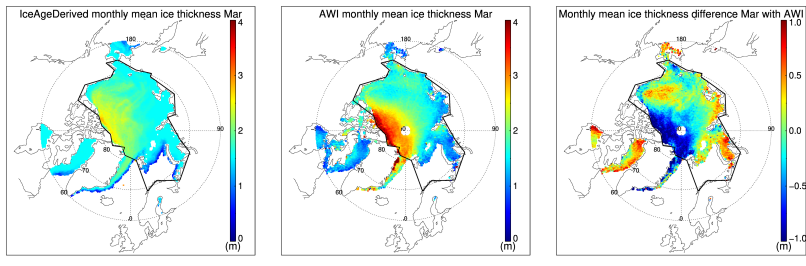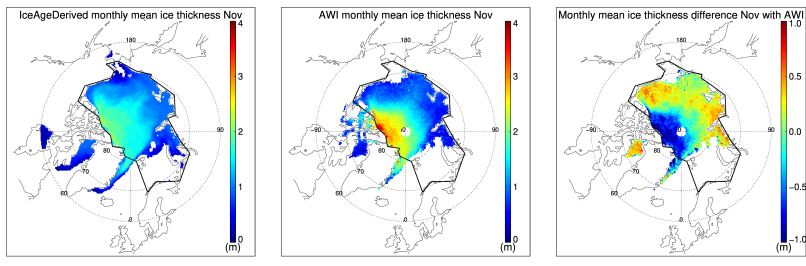

075 **Figure 9:** Monthly mean ice thickness from IceAgeDerived (top left), from AWI CrvoSat-2 (top middle), and their difference in March 2011-2018; and monthly mean ice thickness from IceAgeDerived (bottom left), from AWI CrvoSat-2 (bottom middle), and their difference in November 2011-2018.

**Formatted:** Font: Bold, Complex Script Font: Not Bold

**Formatted:** Caption, Automatically adjust right indent when grid is defined, Space After: 0 pt, Widow/Orphan control, Adjust space between Latin and Asian text, Adjust space between Asian text and numbers, Tab stops: Not at 0.15" + 0.5"

**Deleted:** Cryosat

**Deleted:** Cryosat

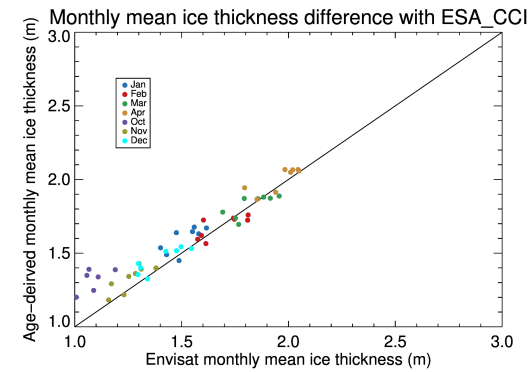

Figure 10: Scatter plot of IceAgeDerived monthly mean ice thickness and Envisat monthly mean ice thickness from ESA CCI.

**Formatted:** Font: Bold, Complex Script Font: Not Bold

**Formatted:** Caption, Automatically adjust right indent when grid is defined, Space After: 0 pt, Widow/Orphan control, Adjust space between Latin and Asian text, Adjust space between Asian text and numbers, Tab stops: Not at 0.15" + 0.5"

**Deleted:** ing

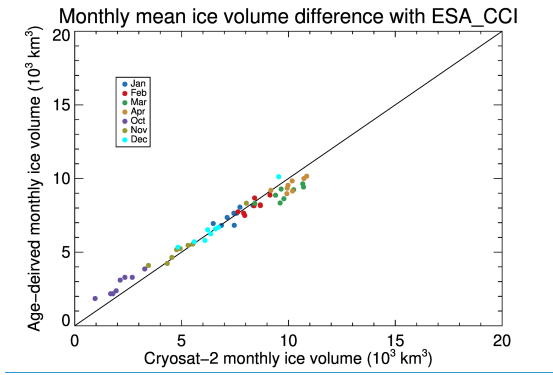

Figure 11: Scatter plot of IceAgeDerived monthly ice volume and Envisat monthly ice volume from ESA CCI.

**Formatted:** Font: Bold, Complex Script Font: Not Bold

**Formatted:** Caption, Automatically adjust right indent when grid is defined, Space After: 0 pt, Widow/Orphan control, Adjust space between Latin and Asian text, Adjust space between Asian text and numbers, Tab stops: Not at 0.15" + 0.5"

**Deleted:** ing

**Deleted:** S

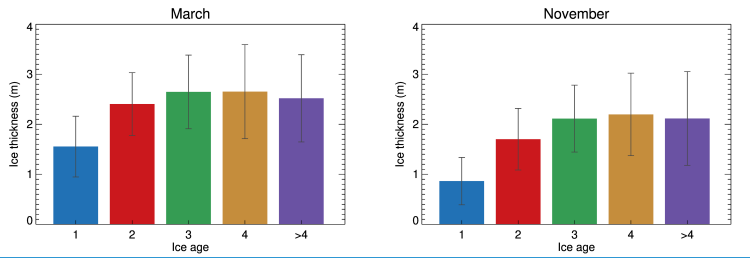

Figure 12: Ice age versus ice thickness from collocated ice age and AWI CryoSat-2 ice thickness. The error bar shows one standard deviation of ice thickness in each ice age category.

**Formatted:** Font: Bold, Complex Script Font: Not Bold

**Formatted:** Caption, Automatically adjust right indent when grid is defined, Space After: 0 pt, Widow/Orphan control, Adjust space between Latin and Asian text, Adjust space between Asian text and numbers, Tab stops: Not at 0.15" + 0.5"

**Deleted:** Cryosat2

**Deleted:** the

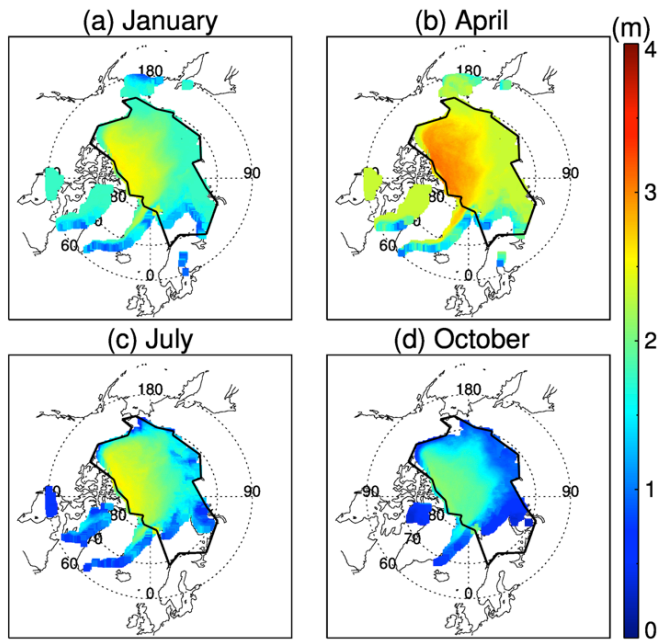

100 **Figure 13:** Derived climatological mean sea ice thickness distribution 1984 to 2018 from ice age in the Arctic in January, April, July, and October. [The polygon outlines the Arctic Ocean defined in this study, as in Kwok 2018.](#)

**Formatted:** Font: Bold, Complex Script Font: Not Bold

**Deleted:** 7



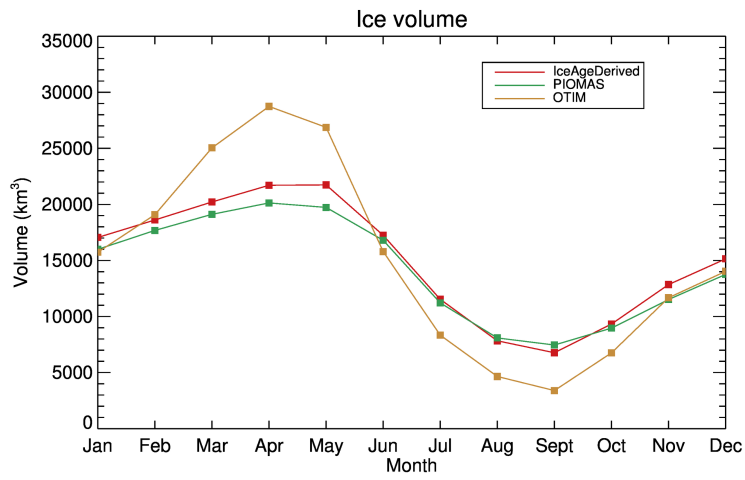

105 **Figure 14:** Derived climatological mean annual cycle of ice volume 1984-2018 over the Arctic Ocean.

**Formatted:** Font: Bold, Complex Script Font: Not Bold

**Deleted:** &

**Deleted:** in

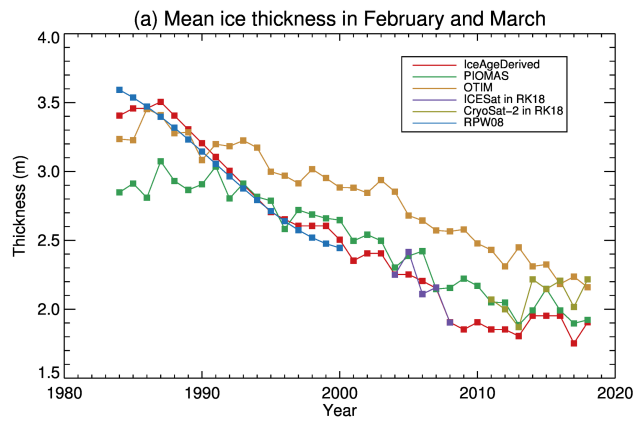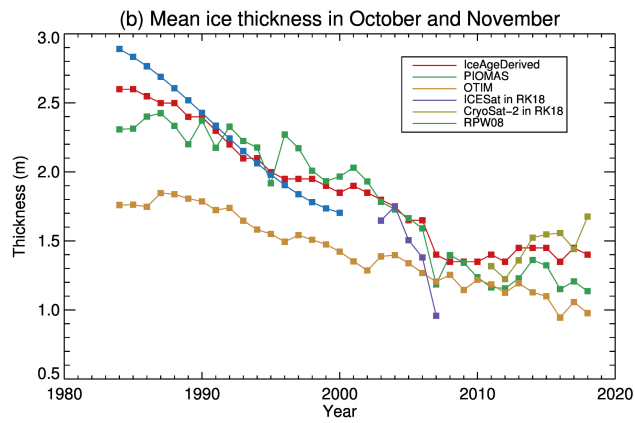

**Figure 15:** Mean ice thickness in February and March from 1984 to 2018 derived from ice age, PIOMAS, OTIM, ICESat (2004-2008), CryoSat (2011-2018), and submarine data (1984-2000) over the SCICEX data release area.

- Deleted: 9
- Formatted: Font: Bold, Complex Script Font: Not Bold
- Deleted: from
- Deleted: in GORE box
- Deleted: from
- Deleted: and from
- Deleted: and
- Deleted: CryoSat

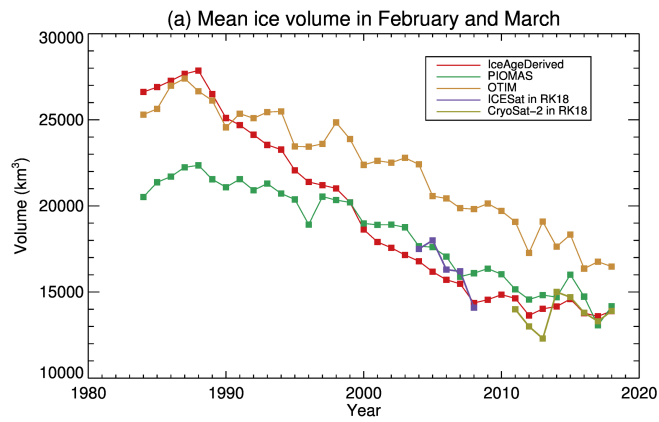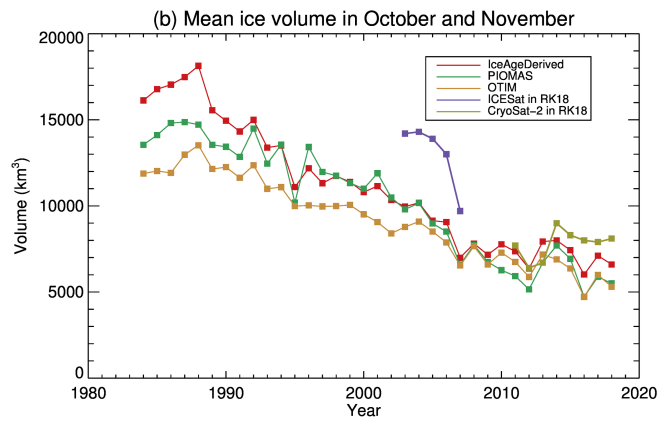

125 **Figure 16:** Mean Arctic ice volume in February and March (a) and from October and November (b) from 1984 to 2018 derived from ice age, PIOMAS, OTIM, ICESat (2003-2007), and CryoSat (2011-2018) over the Arctic Ocean.

- Deleted: 0
- Formatted: Font: Bold, Complex Script Font: Not Bold
- Deleted: from
- Deleted: from
- Deleted: and
- Deleted: CryoSat

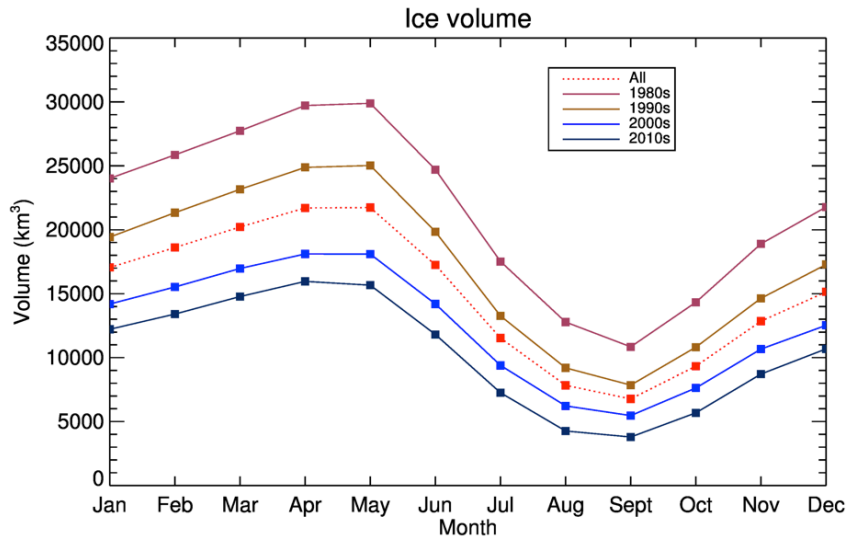

135 **Figure 17:** ~~IceAgeDerived~~ climatological mean annual cycle of ice volume in 1980s, 1990s, 200s, 2010s, and in all years ~~over the Arctic Ocean~~.

**Formatted:** Font: Bold, Complex Script Font: Not Bold  
~~Deleted:~~ 1  
~~Deleted:~~ Derived

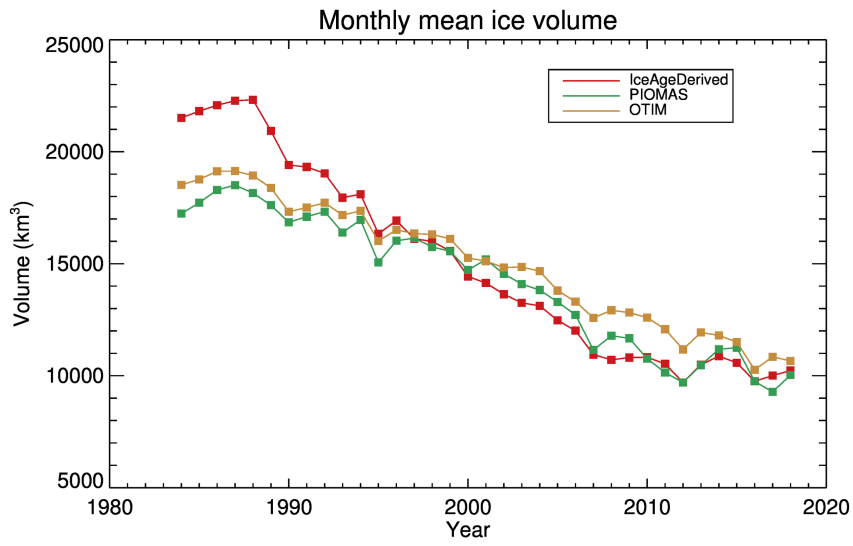

1140

Figure 18: Mean monthly Arctic ice volume from 1984 to 2018 derived from ice age, PIOMAS, and OTIM over the Arctic Ocean.

- Formatted: Font: Bold, Complex Script Font: Not Bold
- Deleted: 2
- Deleted: from
- Deleted: from

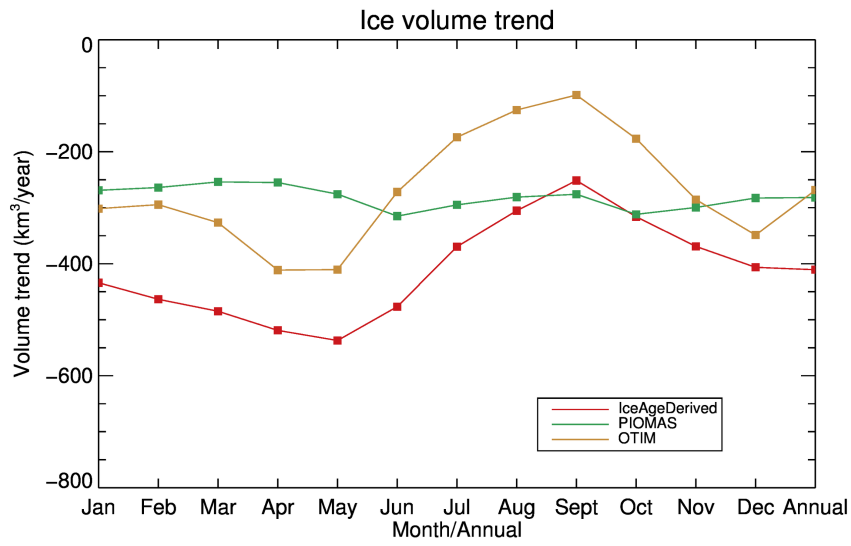

Figure 19: Trend of Arctic ice volume in each month and in the annual mean from 1984 to 2018 derived from ice age, PIOMAS, and OTIM over the Arctic Ocean.

- Formatted: Font: Bold, Complex Script Font: Not Bold
- Deleted: 3
- Deleted: from
- Deleted: from

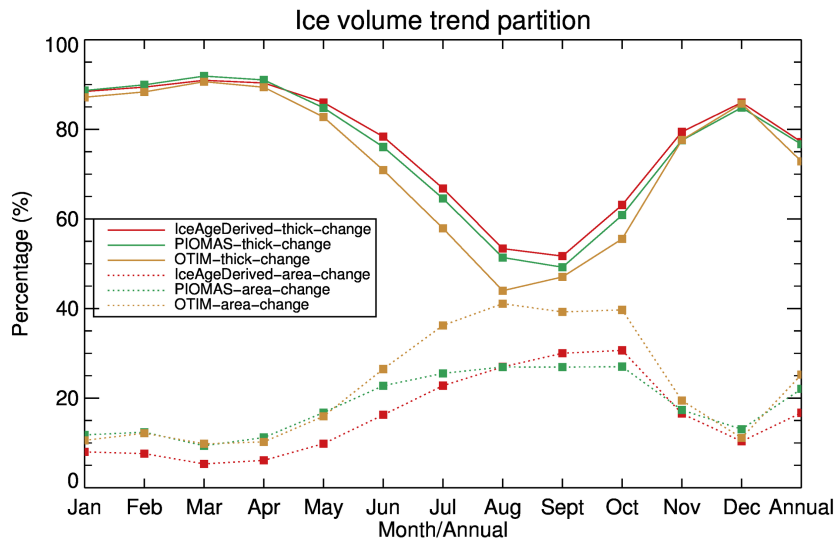

Figure 20: Partition of trend of Arctic Ocean ice volume in each month and in the annual mean from 1984 to 2018 to ice area and changes in ice thickness derived from ice age, PIOMAS, and OTIM.

- Deleted: 14
- Formatted: Font: Bold, Complex Script Font: Not Bold
- Deleted: from
- Deleted: from
- Deleted: and ice area

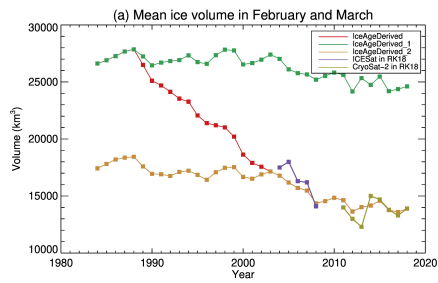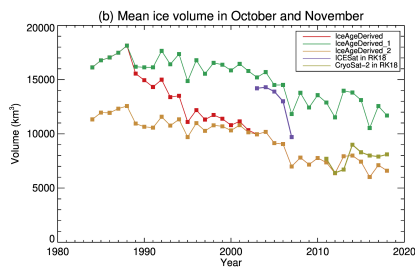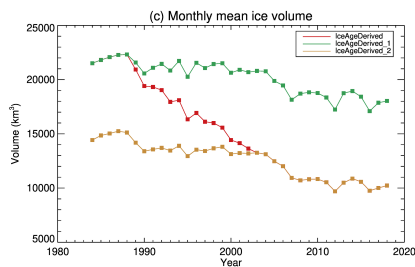

**Figure 21:** Mean ice thickness over the Arctic Ocean from 1984 to 2018 derived from ice age using a varying age-thickness relationship (IceAgeDerived), using the age-thickness relationship in 1984 (IceAgeDerived\_1) and using the age-thickness relationship in 2004-2008 (ICESat) (IceAgeDerived\_2) in (a) February and March, (b) October and November, and (c) monthly mean of all months.

**Formatted:** Font: Bold

**Formatted:** Caption



Appendix

1170

**Table A1.** Monthly mean values of the correction term  $f(\tau)$  in Eq. 1, from Table 4 in Rothrock et al. (2008).

| Month     | $f(\tau)_m$ |
|-----------|-------------|
| January   | 0.087       |
| February  | 0.098       |
| March     | 0.110       |
| April     | 0.118       |
| May       | 0.122       |
| June      | 0.113       |
| July      | 0.026       |
| August    | 0.004       |
| September | 0.025       |
| October   | 0.054       |
| November  | 0.070       |
| December  | 0.081       |

- Formatted: Font: Bold
- Deleted: ¶
- Formatted: Caption
- Formatted ... [256]
- Formatted ... [257]
- Formatted ... [258]
- Formatted ... [259]
- Formatted ... [260]
- Formatted ... [261]
- Formatted ... [262]
- Formatted ... [263]
- Formatted ... [264]
- Formatted ... [265]
- Formatted ... [266]
- Formatted ... [267]
- Formatted ... [268]
- Formatted ... [269]
- Formatted ... [270]
- Formatted ... [271]
- Formatted ... [272]
- Formatted ... [273]
- Formatted ... [274]
- Formatted ... [275]
- Formatted ... [276]
- Formatted ... [277]
- Formatted ... [278]
- Formatted ... [279]
- Formatted ... [280]
- Formatted ... [281]

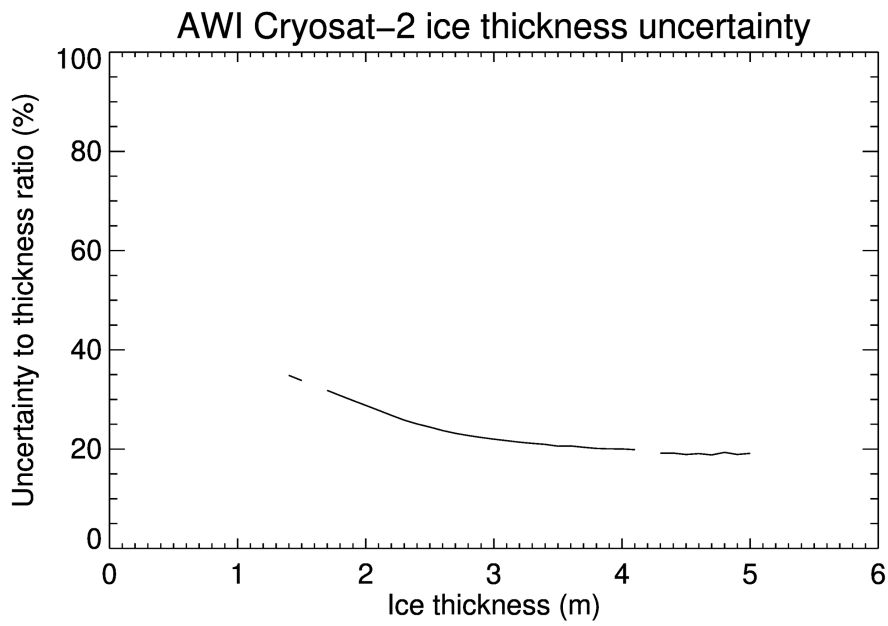

[Figure A1: The percentage of uncertainty to sea ice thickness in AWI CryoSat-2 monthly mean ice thickness 2011-2018.](#)

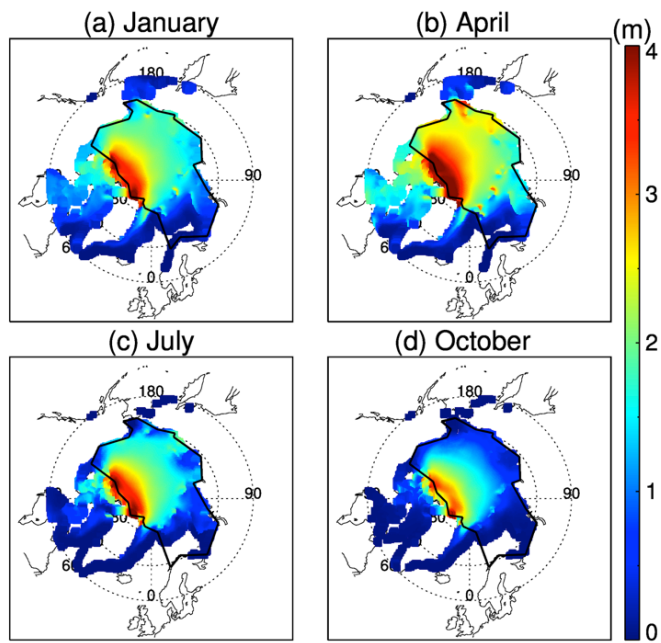

Figure A2: Derived climatological mean sea ice thickness distribution in the Arctic from PIOMAS, 1984 to 2018.

Deleted: 1  
Deleted: 0  
Formatted: Font: Bold, Complex Script Font: Not Bold  
Formatted: Font: Bold, Complex Script Font: Not Bold

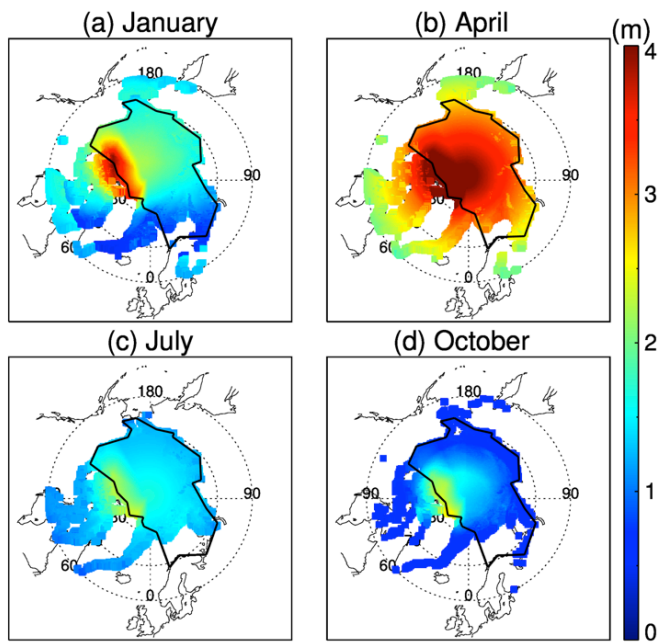

1185

**Figure A3.** Derived climatological mean sea ice thickness distribution in the Arctic from OTIM, 1984 to 2018.

**Formatted:** Font: Bold, Complex Script Font: Not Bold

**Deleted:** 2

**Formatted:** Font: Bold, Complex Script Font: Not Bold

**Page 10: [1] Formatted** **YINGHUI LIU** **12/12/19 5:30:00 PM**

Superscript

**Page 10: [1] Formatted** **YINGHUI LIU** **12/12/19 5:30:00 PM**

Superscript

**Page 10: [1] Formatted** **YINGHUI LIU** **12/12/19 5:30:00 PM**

Superscript

**Page 10: [2] Formatted** **YINGHUI LIU** **12/12/19 5:32:00 PM**

Superscript

**Page 10: [2] Formatted** **YINGHUI LIU** **12/12/19 5:32:00 PM**

Superscript

**Page 10: [3] Deleted** **Microsoft Office User** **12/17/19 3:56:00 PM**

Cryosat

**Page 10: [3] Deleted** **Microsoft Office User** **12/17/19 3:56:00 PM**

Cryosat

**Page 10: [3] Deleted** **Microsoft Office User** **12/17/19 3:56:00 PM**

Cryosat

**Page 10: [4] Deleted** **Microsoft Office User** **12/17/19 3:56:00 PM**

/

**Page 10: [4] Deleted** **Microsoft Office User** **12/17/19 3:56:00 PM**

/

**Page 10: [4] Deleted** **Microsoft Office User** **12/17/19 3:56:00 PM**

/

**Page 10: [4] Deleted** **Microsoft Office User** **12/17/19 3:56:00 PM**

/

**Page 10: [4] Deleted** **Microsoft Office User** **12/17/19 3:56:00 PM**

/

**Page 10: [4] Deleted** **Microsoft Office User** **12/17/19 3:56:00 PM**

/

**Page 10: [4] Deleted** **Microsoft Office User** **12/17/19 3:56:00 PM**

/

**Page 10: [4] Deleted** **Microsoft Office User** **12/17/19 3:56:00 PM**

/

|                             |                              |                            |
|-----------------------------|------------------------------|----------------------------|
| <b>Page 10: [4] Deleted</b> | <b>Microsoft Office User</b> | <b>12/17/19 3:56:00 PM</b> |
|-----------------------------|------------------------------|----------------------------|

/

|                             |                              |                            |
|-----------------------------|------------------------------|----------------------------|
| <b>Page 10: [4] Deleted</b> | <b>Microsoft Office User</b> | <b>12/17/19 3:56:00 PM</b> |
|-----------------------------|------------------------------|----------------------------|

/

|                             |                              |                            |
|-----------------------------|------------------------------|----------------------------|
| <b>Page 10: [4] Deleted</b> | <b>Microsoft Office User</b> | <b>12/17/19 3:56:00 PM</b> |
|-----------------------------|------------------------------|----------------------------|

/

|                               |                    |                            |
|-------------------------------|--------------------|----------------------------|
| <b>Page 10: [5] Formatted</b> | <b>YINGHUI LIU</b> | <b>12/12/19 5:54:00 PM</b> |
|-------------------------------|--------------------|----------------------------|

Superscript

|                               |                    |                            |
|-------------------------------|--------------------|----------------------------|
| <b>Page 10: [5] Formatted</b> | <b>YINGHUI LIU</b> | <b>12/12/19 5:54:00 PM</b> |
|-------------------------------|--------------------|----------------------------|

Superscript

|                             |                              |                            |
|-----------------------------|------------------------------|----------------------------|
| <b>Page 10: [6] Deleted</b> | <b>Microsoft Office User</b> | <b>12/17/19 3:58:00 PM</b> |
|-----------------------------|------------------------------|----------------------------|

M

|                             |                              |                            |
|-----------------------------|------------------------------|----------------------------|
| <b>Page 10: [6] Deleted</b> | <b>Microsoft Office User</b> | <b>12/17/19 3:58:00 PM</b> |
|-----------------------------|------------------------------|----------------------------|

M

|                             |                              |                            |
|-----------------------------|------------------------------|----------------------------|
| <b>Page 10: [6] Deleted</b> | <b>Microsoft Office User</b> | <b>12/17/19 3:58:00 PM</b> |
|-----------------------------|------------------------------|----------------------------|

M

|                             |                              |                            |
|-----------------------------|------------------------------|----------------------------|
| <b>Page 10: [6] Deleted</b> | <b>Microsoft Office User</b> | <b>12/17/19 3:58:00 PM</b> |
|-----------------------------|------------------------------|----------------------------|

M

|                             |                              |                            |
|-----------------------------|------------------------------|----------------------------|
| <b>Page 10: [6] Deleted</b> | <b>Microsoft Office User</b> | <b>12/17/19 3:58:00 PM</b> |
|-----------------------------|------------------------------|----------------------------|

M

|                             |                              |                            |
|-----------------------------|------------------------------|----------------------------|
| <b>Page 10: [6] Deleted</b> | <b>Microsoft Office User</b> | <b>12/17/19 3:58:00 PM</b> |
|-----------------------------|------------------------------|----------------------------|

M

|                             |                              |                            |
|-----------------------------|------------------------------|----------------------------|
| <b>Page 10: [6] Deleted</b> | <b>Microsoft Office User</b> | <b>12/17/19 3:58:00 PM</b> |
|-----------------------------|------------------------------|----------------------------|

M

|                             |                              |                            |
|-----------------------------|------------------------------|----------------------------|
| <b>Page 10: [6] Deleted</b> | <b>Microsoft Office User</b> | <b>12/17/19 3:58:00 PM</b> |
|-----------------------------|------------------------------|----------------------------|

M

|                             |                              |                            |
|-----------------------------|------------------------------|----------------------------|
| <b>Page 10: [6] Deleted</b> | <b>Microsoft Office User</b> | <b>12/17/19 3:58:00 PM</b> |
|-----------------------------|------------------------------|----------------------------|

M

|                             |                              |                            |
|-----------------------------|------------------------------|----------------------------|
| <b>Page 10: [6] Deleted</b> | <b>Microsoft Office User</b> | <b>12/17/19 3:58:00 PM</b> |
|-----------------------------|------------------------------|----------------------------|

M

|                             |                              |                            |
|-----------------------------|------------------------------|----------------------------|
| <b>Page 10: [6] Deleted</b> | <b>Microsoft Office User</b> | <b>12/17/19 3:58:00 PM</b> |
|-----------------------------|------------------------------|----------------------------|

M

|                             |                              |                            |
|-----------------------------|------------------------------|----------------------------|
| <b>Page 10: [6] Deleted</b> | <b>Microsoft Office User</b> | <b>12/17/19 3:58:00 PM</b> |
|-----------------------------|------------------------------|----------------------------|

M

|                             |                              |                            |
|-----------------------------|------------------------------|----------------------------|
| <b>Page 10: [6] Deleted</b> | <b>Microsoft Office User</b> | <b>12/17/19 3:58:00 PM</b> |
|-----------------------------|------------------------------|----------------------------|

M

|                             |                              |                            |
|-----------------------------|------------------------------|----------------------------|
| <b>Page 10: [6] Deleted</b> | <b>Microsoft Office User</b> | <b>12/17/19 3:58:00 PM</b> |
|-----------------------------|------------------------------|----------------------------|

M

|                             |                              |                            |
|-----------------------------|------------------------------|----------------------------|
| <b>Page 10: [6] Deleted</b> | <b>Microsoft Office User</b> | <b>12/17/19 3:58:00 PM</b> |
|-----------------------------|------------------------------|----------------------------|

M

|                             |                              |                            |
|-----------------------------|------------------------------|----------------------------|
| <b>Page 10: [6] Deleted</b> | <b>Microsoft Office User</b> | <b>12/17/19 3:58:00 PM</b> |
|-----------------------------|------------------------------|----------------------------|

M

|                             |                              |                            |
|-----------------------------|------------------------------|----------------------------|
| <b>Page 10: [6] Deleted</b> | <b>Microsoft Office User</b> | <b>12/17/19 3:58:00 PM</b> |
|-----------------------------|------------------------------|----------------------------|

M

|                             |                              |                            |
|-----------------------------|------------------------------|----------------------------|
| <b>Page 10: [6] Deleted</b> | <b>Microsoft Office User</b> | <b>12/17/19 3:58:00 PM</b> |
|-----------------------------|------------------------------|----------------------------|

M

|                             |                              |                            |
|-----------------------------|------------------------------|----------------------------|
| <b>Page 10: [6] Deleted</b> | <b>Microsoft Office User</b> | <b>12/17/19 3:58:00 PM</b> |
|-----------------------------|------------------------------|----------------------------|

M

|                             |                              |                            |
|-----------------------------|------------------------------|----------------------------|
| <b>Page 10: [6] Deleted</b> | <b>Microsoft Office User</b> | <b>12/17/19 3:58:00 PM</b> |
|-----------------------------|------------------------------|----------------------------|

M

|                             |                              |                            |
|-----------------------------|------------------------------|----------------------------|
| <b>Page 10: [6] Deleted</b> | <b>Microsoft Office User</b> | <b>12/17/19 3:58:00 PM</b> |
|-----------------------------|------------------------------|----------------------------|

M

|                             |                              |                            |
|-----------------------------|------------------------------|----------------------------|
| <b>Page 10: [6] Deleted</b> | <b>Microsoft Office User</b> | <b>12/17/19 3:58:00 PM</b> |
|-----------------------------|------------------------------|----------------------------|

M

|                             |                              |                            |
|-----------------------------|------------------------------|----------------------------|
| <b>Page 10: [6] Deleted</b> | <b>Microsoft Office User</b> | <b>12/17/19 3:58:00 PM</b> |
|-----------------------------|------------------------------|----------------------------|

M

|                             |                              |                            |
|-----------------------------|------------------------------|----------------------------|
| <b>Page 10: [6] Deleted</b> | <b>Microsoft Office User</b> | <b>12/17/19 3:58:00 PM</b> |
|-----------------------------|------------------------------|----------------------------|

M

|                             |                              |                            |
|-----------------------------|------------------------------|----------------------------|
| <b>Page 10: [6] Deleted</b> | <b>Microsoft Office User</b> | <b>12/17/19 3:58:00 PM</b> |
|-----------------------------|------------------------------|----------------------------|

M

|                             |                              |                            |
|-----------------------------|------------------------------|----------------------------|
| <b>Page 10: [6] Deleted</b> | <b>Microsoft Office User</b> | <b>12/17/19 3:58:00 PM</b> |
|-----------------------------|------------------------------|----------------------------|

M

|                             |                              |                            |
|-----------------------------|------------------------------|----------------------------|
| <b>Page 10: [6] Deleted</b> | <b>Microsoft Office User</b> | <b>12/17/19 3:58:00 PM</b> |
|-----------------------------|------------------------------|----------------------------|

M

**Page 10: [6] Deleted**                      **Microsoft Office User**                      **12/17/19 3:58:00 PM**  
M

**Page 10: [6] Deleted**                      **Microsoft Office User**                      **12/17/19 3:58:00 PM**  
M

**Page 10: [6] Deleted**                      **Microsoft Office User**                      **12/17/19 3:58:00 PM**  
M

**Page 10: [6] Deleted**                      **Microsoft Office User**                      **12/17/19 3:58:00 PM**  
M

**Page 10: [6] Deleted**                      **Microsoft Office User**                      **12/17/19 3:58:00 PM**  
M

**Page 10: [6] Deleted**                      **Microsoft Office User**                      **12/17/19 3:58:00 PM**  
M

**Page 10: [6] Deleted**                      **Microsoft Office User**                      **12/17/19 3:58:00 PM**  
M

**Page 10: [6] Deleted**                      **Microsoft Office User**                      **12/17/19 3:58:00 PM**  
M

**Page 10: [6] Deleted**                      **Microsoft Office User**                      **12/17/19 3:58:00 PM**  
M

**Page 10: [6] Deleted**                      **Microsoft Office User**                      **12/17/19 3:58:00 PM**  
M

**Page 20: [7] Formatted**                      **Jeff Key**                      **12/17/19 6:51:00 AM**  
Font: Bold, Complex Script Font: Not Bold

**Page 20: [8] Deleted**                      **YINGHUI LIU**                      **1/1/20 8:33:00 PM**  
I

**Page 20: [8] Deleted**                      **YINGHUI LIU**                      **1/1/20 8:33:00 PM**  
I

**Page 20: [8] Deleted**                      **YINGHUI LIU**                      **1/1/20 8:33:00 PM**  
I

**Page 20: [9] Formatted**                      **Microsoft Office User**                      **12/17/19 9:54:00 AM**  
Font: (Default) +Body (Times New Roman), Complex Script Font: +Body (Times New Roman), 10 pt

**Page 20: [10] Formatted Table**                      **Microsoft Office User**                      **12/17/19 9:56:00 AM**  
Formatted Table



|                                                                                                                       |                              |                            |
|-----------------------------------------------------------------------------------------------------------------------|------------------------------|----------------------------|
| <b>Page 20: [11] Formatted</b>                                                                                        | <b>Microsoft Office User</b> | <b>12/17/19 9:54:00 AM</b> |
| Font: (Default) +Body (Times New Roman), 10 pt, Font color: Auto, Complex Script Font: +Body (Times New Roman), 10 pt |                              |                            |
| <b>Page 20: [12] Formatted</b>                                                                                        | <b>Microsoft Office User</b> | <b>12/17/19 9:54:00 AM</b> |
| Font: (Default) +Body (Times New Roman), 10 pt, Not Bold, Complex Script Font: +Body (Times New Roman), 10 pt         |                              |                            |
| <b>Page 20: [13] Formatted</b>                                                                                        | <b>Microsoft Office User</b> | <b>12/17/19 9:54:00 AM</b> |
| Font: (Default) +Body (Times New Roman), Complex Script Font: +Body (Times New Roman), 10 pt                          |                              |                            |
| <b>Page 20: [13] Formatted</b>                                                                                        | <b>Microsoft Office User</b> | <b>12/17/19 9:54:00 AM</b> |
| Font: (Default) +Body (Times New Roman), Complex Script Font: +Body (Times New Roman), 10 pt                          |                              |                            |
| <b>Page 20: [14] Formatted</b>                                                                                        | <b>Microsoft Office User</b> | <b>12/17/19 9:54:00 AM</b> |
| Font: (Default) +Body (Times New Roman), Complex Script Font: +Body (Times New Roman), 10 pt                          |                              |                            |
| <b>Page 20: [14] Formatted</b>                                                                                        | <b>Microsoft Office User</b> | <b>12/17/19 9:54:00 AM</b> |
| Font: (Default) +Body (Times New Roman), Complex Script Font: +Body (Times New Roman), 10 pt                          |                              |                            |
| <b>Page 20: [15] Formatted</b>                                                                                        | <b>Microsoft Office User</b> | <b>12/17/19 9:54:00 AM</b> |
| Font: (Default) +Body (Times New Roman), Complex Script Font: +Body (Times New Roman), 10 pt                          |                              |                            |
| <b>Page 20: [15] Formatted</b>                                                                                        | <b>Microsoft Office User</b> | <b>12/17/19 9:54:00 AM</b> |
| Font: (Default) +Body (Times New Roman), Complex Script Font: +Body (Times New Roman), 10 pt                          |                              |                            |
| <b>Page 20: [16] Formatted</b>                                                                                        | <b>Microsoft Office User</b> | <b>12/17/19 9:54:00 AM</b> |
| Font: (Default) +Body (Times New Roman), Complex Script Font: +Body (Times New Roman), 10 pt                          |                              |                            |
| <b>Page 20: [16] Formatted</b>                                                                                        | <b>Microsoft Office User</b> | <b>12/17/19 9:54:00 AM</b> |
| Font: (Default) +Body (Times New Roman), Complex Script Font: +Body (Times New Roman), 10 pt                          |                              |                            |
| <b>Page 20: [17] Formatted</b>                                                                                        | <b>Microsoft Office User</b> | <b>12/17/19 9:54:00 AM</b> |
| Font: (Default) +Body (Times New Roman), Complex Script Font: +Body (Times New Roman), 10 pt                          |                              |                            |
| <b>Page 20: [17] Formatted</b>                                                                                        | <b>Microsoft Office User</b> | <b>12/17/19 9:54:00 AM</b> |
| Font: (Default) +Body (Times New Roman), Complex Script Font: +Body (Times New Roman), 10 pt                          |                              |                            |
| <b>Page 20: [18] Formatted</b>                                                                                        | <b>Microsoft Office User</b> | <b>12/17/19 9:54:00 AM</b> |
| Font: (Default) +Body (Times New Roman), Complex Script Font: +Body (Times New Roman), 10 pt                          |                              |                            |
| <b>Page 20: [18] Formatted</b>                                                                                        | <b>Microsoft Office User</b> | <b>12/17/19 9:54:00 AM</b> |
| Font: (Default) +Body (Times New Roman), Complex Script Font: +Body (Times New Roman), 10 pt                          |                              |                            |
| <b>Page 20: [19] Formatted</b>                                                                                        | <b>Microsoft Office User</b> | <b>12/17/19 9:54:00 AM</b> |
| Font: (Default) +Body (Times New Roman), Complex Script Font: +Body (Times New Roman), 10 pt                          |                              |                            |
| <b>Page 20: [19] Formatted</b>                                                                                        | <b>Microsoft Office User</b> | <b>12/17/19 9:54:00 AM</b> |



















|                                                                                                                       |                              |                            |
|-----------------------------------------------------------------------------------------------------------------------|------------------------------|----------------------------|
| <b>Page 21: [83] Formatted</b>                                                                                        | <b>Microsoft Office User</b> | <b>12/17/19 9:54:00 AM</b> |
| Font: (Default) +Body (Times New Roman), Complex Script Font: +Body (Times New Roman), 10 pt                          |                              |                            |
| <b>Page 21: [84] Formatted</b>                                                                                        | <b>Microsoft Office User</b> | <b>12/17/19 9:54:00 AM</b> |
| Font: (Default) +Body (Times New Roman), Bold, Complex Script Font: +Body (Times New Roman), 10 pt, Bold              |                              |                            |
| <b>Page 21: [84] Formatted</b>                                                                                        | <b>Microsoft Office User</b> | <b>12/17/19 9:54:00 AM</b> |
| Font: (Default) +Body (Times New Roman), Bold, Complex Script Font: +Body (Times New Roman), 10 pt, Bold              |                              |                            |
| <b>Page 21: [85] Formatted</b>                                                                                        | <b>Microsoft Office User</b> | <b>12/17/19 9:54:00 AM</b> |
| Font: (Default) +Body (Times New Roman), Complex Script Font: +Body (Times New Roman), 10 pt                          |                              |                            |
| <b>Page 21: [85] Formatted</b>                                                                                        | <b>Microsoft Office User</b> | <b>12/17/19 9:54:00 AM</b> |
| Font: (Default) +Body (Times New Roman), Complex Script Font: +Body (Times New Roman), 10 pt                          |                              |                            |
| <b>Page 21: [86] Formatted</b>                                                                                        | <b>Microsoft Office User</b> | <b>12/17/19 9:54:00 AM</b> |
| Font: (Default) +Body (Times New Roman), Complex Script Font: +Body (Times New Roman), 10 pt                          |                              |                            |
| <b>Page 21: [86] Formatted</b>                                                                                        | <b>Microsoft Office User</b> | <b>12/17/19 9:54:00 AM</b> |
| Font: (Default) +Body (Times New Roman), Complex Script Font: +Body (Times New Roman), 10 pt                          |                              |                            |
| <b>Page 22: [87] Formatted</b>                                                                                        | <b>Jeff Key</b>              | <b>12/17/19 6:52:00 AM</b> |
| Font: Bold, Complex Script Font: Not Bold                                                                             |                              |                            |
| <b>Page 22: [88] Formatted</b>                                                                                        | <b>Microsoft Office User</b> | <b>12/17/19 9:54:00 AM</b> |
| Font: (Default) +Body (Times New Roman), Complex Script Font: +Body (Times New Roman), 10 pt                          |                              |                            |
| <b>Page 22: [89] Formatted Table</b>                                                                                  | <b>Jeff Key</b>              | <b>12/17/19 6:52:00 AM</b> |
| Formatted Table                                                                                                       |                              |                            |
| <b>Page 22: [90] Formatted</b>                                                                                        | <b>Microsoft Office User</b> | <b>12/17/19 9:54:00 AM</b> |
| Font: (Default) +Body (Times New Roman), 10 pt, Font color: Auto, Complex Script Font: +Body (Times New Roman), 10 pt |                              |                            |
| <b>Page 22: [91] Formatted</b>                                                                                        | <b>Microsoft Office User</b> | <b>12/17/19 9:54:00 AM</b> |
| Font: (Default) +Body (Times New Roman), 10 pt, Not Bold, Complex Script Font: +Body (Times New Roman), 10 pt         |                              |                            |
| <b>Page 22: [92] Formatted</b>                                                                                        | <b>Microsoft Office User</b> | <b>12/17/19 9:54:00 AM</b> |
| Font: (Default) +Body (Times New Roman), Complex Script Font: +Body (Times New Roman), 10 pt                          |                              |                            |
| <b>Page 22: [92] Formatted</b>                                                                                        | <b>Microsoft Office User</b> | <b>12/17/19 9:54:00 AM</b> |
| Font: (Default) +Body (Times New Roman), Complex Script Font: +Body (Times New Roman), 10 pt                          |                              |                            |
| <b>Page 22: [93] Formatted</b>                                                                                        | <b>Microsoft Office User</b> | <b>12/17/19 9:54:00 AM</b> |
| Font: (Default) +Body (Times New Roman), Complex Script Font: +Body (Times New Roman), 10 pt                          |                              |                            |
| <b>Page 22: [93] Formatted</b>                                                                                        | <b>Microsoft Office User</b> | <b>12/17/19 9:54:00 AM</b> |









|                                                                                                                       |                              |                            |
|-----------------------------------------------------------------------------------------------------------------------|------------------------------|----------------------------|
| <b>Page 22: [126] Formatted</b>                                                                                       | <b>Microsoft Office User</b> | <b>12/17/19 9:54:00 AM</b> |
| Font: (Default) +Body (Times New Roman), Complex Script Font: +Body (Times New Roman), 10 pt                          |                              |                            |
| <b>Page 22: [126] Formatted</b>                                                                                       | <b>Microsoft Office User</b> | <b>12/17/19 9:54:00 AM</b> |
| Font: (Default) +Body (Times New Roman), Complex Script Font: +Body (Times New Roman), 10 pt                          |                              |                            |
| <b>Page 22: [127] Formatted</b>                                                                                       | <b>Microsoft Office User</b> | <b>12/17/19 9:54:00 AM</b> |
| Font: (Default) +Body (Times New Roman), Bold, Complex Script Font: +Body (Times New Roman), 10 pt, Bold              |                              |                            |
| <b>Page 22: [127] Formatted</b>                                                                                       | <b>Microsoft Office User</b> | <b>12/17/19 9:54:00 AM</b> |
| Font: (Default) +Body (Times New Roman), Bold, Complex Script Font: +Body (Times New Roman), 10 pt, Bold              |                              |                            |
| <b>Page 22: [128] Formatted</b>                                                                                       | <b>Microsoft Office User</b> | <b>12/17/19 9:54:00 AM</b> |
| Font: (Default) +Body (Times New Roman), Complex Script Font: +Body (Times New Roman), 10 pt                          |                              |                            |
| <b>Page 22: [128] Formatted</b>                                                                                       | <b>Microsoft Office User</b> | <b>12/17/19 9:54:00 AM</b> |
| Font: (Default) +Body (Times New Roman), Complex Script Font: +Body (Times New Roman), 10 pt                          |                              |                            |
| <b>Page 22: [129] Formatted</b>                                                                                       | <b>Microsoft Office User</b> | <b>12/17/19 9:54:00 AM</b> |
| Font: (Default) +Body (Times New Roman), Complex Script Font: +Body (Times New Roman), 10 pt                          |                              |                            |
| <b>Page 22: [129] Formatted</b>                                                                                       | <b>Microsoft Office User</b> | <b>12/17/19 9:54:00 AM</b> |
| Font: (Default) +Body (Times New Roman), Complex Script Font: +Body (Times New Roman), 10 pt                          |                              |                            |
| <b>Page 23: [130] Formatted</b>                                                                                       | <b>Microsoft Office User</b> | <b>12/17/19 9:54:00 AM</b> |
| Font: (Default) +Body (Times New Roman), Complex Script Font: +Body (Times New Roman), 10 pt                          |                              |                            |
| <b>Page 23: [131] Formatted</b>                                                                                       | <b>Microsoft Office User</b> | <b>12/17/19 9:54:00 AM</b> |
| Font: (Default) +Body (Times New Roman), 10 pt, Font color: Auto, Complex Script Font: +Body (Times New Roman), 10 pt |                              |                            |
| <b>Page 23: [132] Formatted</b>                                                                                       | <b>Microsoft Office User</b> | <b>12/17/19 9:54:00 AM</b> |
| Font: (Default) +Body (Times New Roman), 10 pt, Font color: Auto, Complex Script Font: +Body (Times New Roman), 10 pt |                              |                            |
| <b>Page 23: [133] Formatted</b>                                                                                       | <b>Microsoft Office User</b> | <b>12/17/19 9:54:00 AM</b> |
| Font: (Default) +Body (Times New Roman), Complex Script Font: +Body (Times New Roman), 10 pt                          |                              |                            |
| <b>Page 23: [134] Formatted</b>                                                                                       | <b>Microsoft Office User</b> | <b>12/17/19 9:54:00 AM</b> |
| Font: (Default) +Body (Times New Roman), 10 pt, Font color: Auto, Complex Script Font: +Body (Times New Roman), 10 pt |                              |                            |
| <b>Page 23: [135] Formatted</b>                                                                                       | <b>Microsoft Office User</b> | <b>12/17/19 9:54:00 AM</b> |
| Font: (Default) +Body (Times New Roman), Complex Script Font: +Body (Times New Roman), 10 pt                          |                              |                            |
| <b>Page 23: [136] Formatted</b>                                                                                       | <b>Microsoft Office User</b> | <b>12/17/19 9:54:00 AM</b> |

Font: (Default) +Body (Times New Roman), 10 pt, Font color: Auto, Complex Script Font: +Body (Times New Roman), 10 pt

**Page 23: [137] Formatted** **Microsoft Office User** **12/17/19 9:54:00 AM**

Font: (Default) +Body (Times New Roman), Complex Script Font: +Body (Times New Roman), 10 pt

**Page 23: [138] Formatted** **Microsoft Office User** **12/17/19 9:54:00 AM**

Font: (Default) +Body (Times New Roman), 10 pt, Font color: Auto, Complex Script Font: +Body (Times New Roman), 10 pt

**Page 23: [139] Formatted** **Microsoft Office User** **12/17/19 9:54:00 AM**

Font: (Default) +Body (Times New Roman), Complex Script Font: +Body (Times New Roman), 10 pt

**Page 23: [140] Formatted** **Microsoft Office User** **12/17/19 9:54:00 AM**

Font: (Default) +Body (Times New Roman), 10 pt, Font color: Auto, Complex Script Font: +Body (Times New Roman), 10 pt

**Page 23: [141] Formatted** **Microsoft Office User** **12/17/19 9:54:00 AM**

Font: (Default) +Body (Times New Roman), Complex Script Font: +Body (Times New Roman), 10 pt

**Page 23: [142] Formatted** **Microsoft Office User** **12/17/19 9:54:00 AM**

Font: (Default) +Body (Times New Roman), 10 pt, Font color: Auto, Complex Script Font: +Body (Times New Roman), 10 pt

**Page 23: [143] Formatted** **Microsoft Office User** **12/17/19 9:54:00 AM**

Font: (Default) +Body (Times New Roman), Complex Script Font: +Body (Times New Roman), 10 pt

**Page 23: [144] Formatted** **Microsoft Office User** **12/17/19 9:54:00 AM**

Font: (Default) +Body (Times New Roman), 10 pt, Font color: Auto, Complex Script Font: +Body (Times New Roman), 10 pt

**Page 23: [145] Formatted** **Microsoft Office User** **12/17/19 9:54:00 AM**

Font: (Default) +Body (Times New Roman), Complex Script Font: +Body (Times New Roman), 10 pt

**Page 23: [146] Formatted** **Microsoft Office User** **12/17/19 9:54:00 AM**

Font: (Default) +Body (Times New Roman), 10 pt, Complex Script Font: +Body (Times New Roman), 10 pt

**Page 23: [147] Formatted** **Microsoft Office User** **12/17/19 9:54:00 AM**

Font: (Default) +Body (Times New Roman), Complex Script Font: +Body (Times New Roman), 10 pt

**Page 23: [148] Formatted** **Microsoft Office User** **12/17/19 9:54:00 AM**

Font: (Default) +Body (Times New Roman), 10 pt, Complex Script Font: +Body (Times New Roman), 10 pt

**Page 23: [149] Formatted** **Microsoft Office User** **12/17/19 9:54:00 AM**

Font: (Default) +Body (Times New Roman), Bold, Complex Script Font: +Body (Times New Roman), 10 pt, Bold

**Page 23: [150] Formatted** **Microsoft Office User** **12/17/19 9:54:00 AM**



Font: (Default) +Body (Times New Roman), 10 pt, Bold, Complex Script Font: +Body (Times New Roman), 10 pt, Bold

**Page 23: [151] Formatted** **Microsoft Office User** **12/17/19 9:54:00 AM**

Font: (Default) +Body (Times New Roman), Complex Script Font: +Body (Times New Roman), 10 pt

**Page 23: [152] Formatted** **Microsoft Office User** **12/17/19 9:54:00 AM**

Font: (Default) +Body (Times New Roman), 10 pt, Complex Script Font: +Body (Times New Roman), 10 pt

**Page 23: [153] Formatted** **Microsoft Office User** **12/17/19 9:54:00 AM**

Font: (Default) +Body (Times New Roman), Complex Script Font: +Body (Times New Roman), 10 pt

**Page 23: [154] Formatted** **Microsoft Office User** **12/17/19 9:54:00 AM**

Font: (Default) +Body (Times New Roman), 10 pt, Complex Script Font: +Body (Times New Roman), 10 pt

**Page 24: [155] Formatted** **Jeff Key** **12/17/19 6:52:00 AM**

Font: 9 pt, Bold, Complex Script Font: 9 pt, Not Bold

**Page 24: [155] Formatted** **Jeff Key** **12/17/19 6:52:00 AM**

Font: 9 pt, Bold, Complex Script Font: 9 pt, Not Bold

**Page 24: [156] Formatted** **YINGHUI LIU** **12/12/19 5:43:00 PM**

Font: 9 pt, Complex Script Font: 9 pt

**Page 24: [157] Formatted** **YINGHUI LIU** **12/12/19 5:43:00 PM**

Font: 9 pt, Complex Script Font: 9 pt

**Page 24: [158] Formatted** **Microsoft Office User** **12/17/19 9:56:00 AM**

Font: 10 pt, Not Bold, Complex Script Font: Times New Roman, 10 pt

**Page 24: [159] Formatted Table** **Microsoft Office User** **12/17/19 2:34:00 PM**

Formatted Table

**Page 24: [160] Formatted** **Microsoft Office User** **12/17/19 9:56:00 AM**

Font: 10 pt, Complex Script Font: Times New Roman, 10 pt

**Page 24: [161] Formatted** **Microsoft Office User** **12/17/19 9:56:00 AM**

Font: 10 pt, Complex Script Font: Times New Roman, 10 pt

**Page 24: [162] Formatted** **Microsoft Office User** **12/17/19 9:56:00 AM**

Font: 10 pt, Complex Script Font: Times New Roman, 10 pt

**Page 24: [163] Formatted** **Microsoft Office User** **12/17/19 9:56:00 AM**

Font: 10 pt, Complex Script Font: Times New Roman, 10 pt

**Page 24: [164] Formatted** **Microsoft Office User** **12/17/19 9:56:00 AM**

Font: 10 pt, Complex Script Font: Times New Roman, 10 pt

|                                                          |                              |                            |
|----------------------------------------------------------|------------------------------|----------------------------|
| <b>Page 24: [165] Formatted</b>                          | <b>Microsoft Office User</b> | <b>12/17/19 9:56:00 AM</b> |
| Font: 10 pt, Complex Script Font: Times New Roman, 10 pt |                              |                            |
| <b>Page 24: [166] Formatted</b>                          | <b>Microsoft Office User</b> | <b>12/17/19 9:56:00 AM</b> |
| Font: 10 pt, Complex Script Font: Times New Roman, 10 pt |                              |                            |
| <b>Page 24: [167] Formatted</b>                          | <b>Microsoft Office User</b> | <b>12/17/19 9:56:00 AM</b> |
| Font: 10 pt, Complex Script Font: Times New Roman, 10 pt |                              |                            |
| <b>Page 24: [168] Formatted</b>                          | <b>Microsoft Office User</b> | <b>12/17/19 9:56:00 AM</b> |
| Font: 10 pt, Complex Script Font: Times New Roman, 10 pt |                              |                            |
| <b>Page 24: [169] Formatted</b>                          | <b>Microsoft Office User</b> | <b>12/17/19 9:56:00 AM</b> |
| Font: 10 pt, Complex Script Font: Times New Roman, 10 pt |                              |                            |
| <b>Page 24: [170] Formatted</b>                          | <b>Microsoft Office User</b> | <b>12/17/19 9:56:00 AM</b> |
| Font: 10 pt, Complex Script Font: Times New Roman, 10 pt |                              |                            |
| <b>Page 24: [171] Formatted</b>                          | <b>Microsoft Office User</b> | <b>12/17/19 9:56:00 AM</b> |
| Font: 10 pt, Complex Script Font: Times New Roman, 10 pt |                              |                            |
| <b>Page 24: [172] Formatted</b>                          | <b>Microsoft Office User</b> | <b>12/17/19 9:56:00 AM</b> |
| Font: 10 pt, Complex Script Font: Times New Roman, 10 pt |                              |                            |
| <b>Page 24: [173] Formatted</b>                          | <b>Microsoft Office User</b> | <b>12/17/19 9:56:00 AM</b> |
| Font: 10 pt, Complex Script Font: Times New Roman, 10 pt |                              |                            |
| <b>Page 24: [174] Formatted</b>                          | <b>Microsoft Office User</b> | <b>12/17/19 9:56:00 AM</b> |
| Font: 10 pt, Complex Script Font: Times New Roman, 10 pt |                              |                            |
| <b>Page 24: [175] Formatted</b>                          | <b>Microsoft Office User</b> | <b>12/17/19 9:56:00 AM</b> |
| Font: 10 pt, Complex Script Font: Times New Roman, 10 pt |                              |                            |
| <b>Page 24: [176] Formatted</b>                          | <b>Microsoft Office User</b> | <b>12/17/19 9:56:00 AM</b> |
| Font: 10 pt, Complex Script Font: Times New Roman, 10 pt |                              |                            |
| <b>Page 24: [177] Formatted</b>                          | <b>Microsoft Office User</b> | <b>12/17/19 9:56:00 AM</b> |
| Font: 10 pt, Complex Script Font: Times New Roman, 10 pt |                              |                            |
| <b>Page 24: [178] Formatted</b>                          | <b>Microsoft Office User</b> | <b>12/17/19 9:56:00 AM</b> |
| Font: 10 pt, Complex Script Font: Times New Roman, 10 pt |                              |                            |
| <b>Page 24: [179] Formatted</b>                          | <b>Microsoft Office User</b> | <b>12/17/19 9:56:00 AM</b> |
| Font: 10 pt, Complex Script Font: Times New Roman, 10 pt |                              |                            |
| <b>Page 24: [180] Formatted</b>                          | <b>Microsoft Office User</b> | <b>12/17/19 9:56:00 AM</b> |
| Font: 10 pt, Complex Script Font: Times New Roman, 10 pt |                              |                            |

|                                                          |                              |                            |
|----------------------------------------------------------|------------------------------|----------------------------|
| <b>Page 24: [181] Formatted</b>                          | <b>Microsoft Office User</b> | <b>12/17/19 9:56:00 AM</b> |
| Font: 10 pt, Complex Script Font: Times New Roman, 10 pt |                              |                            |
| <b>Page 24: [182] Formatted</b>                          | <b>Microsoft Office User</b> | <b>12/17/19 9:56:00 AM</b> |
| Font: 10 pt, Complex Script Font: Times New Roman, 10 pt |                              |                            |
| <b>Page 24: [183] Formatted</b>                          | <b>Microsoft Office User</b> | <b>12/17/19 9:56:00 AM</b> |
| Font: 10 pt, Complex Script Font: Times New Roman, 10 pt |                              |                            |
| <b>Page 24: [184] Formatted</b>                          | <b>Microsoft Office User</b> | <b>12/17/19 9:56:00 AM</b> |
| Font: 10 pt, Complex Script Font: Times New Roman, 10 pt |                              |                            |
| <b>Page 24: [185] Formatted</b>                          | <b>Microsoft Office User</b> | <b>12/17/19 9:56:00 AM</b> |
| Font: 10 pt, Complex Script Font: Times New Roman, 10 pt |                              |                            |
| <b>Page 24: [186] Formatted</b>                          | <b>Microsoft Office User</b> | <b>12/17/19 9:56:00 AM</b> |
| Font: 10 pt, Complex Script Font: Times New Roman, 10 pt |                              |                            |
| <b>Page 24: [187] Formatted</b>                          | <b>Microsoft Office User</b> | <b>12/17/19 9:56:00 AM</b> |
| Font: 10 pt, Complex Script Font: Times New Roman, 10 pt |                              |                            |
| <b>Page 24: [188] Formatted</b>                          | <b>Microsoft Office User</b> | <b>12/17/19 9:56:00 AM</b> |
| Font: 10 pt, Complex Script Font: Times New Roman, 10 pt |                              |                            |
| <b>Page 24: [189] Formatted</b>                          | <b>Microsoft Office User</b> | <b>12/17/19 9:56:00 AM</b> |
| Font: 10 pt, Complex Script Font: Times New Roman, 10 pt |                              |                            |
| <b>Page 24: [190] Formatted</b>                          | <b>Microsoft Office User</b> | <b>12/17/19 9:56:00 AM</b> |
| Font: 10 pt, Complex Script Font: Times New Roman, 10 pt |                              |                            |
| <b>Page 24: [191] Formatted</b>                          | <b>Microsoft Office User</b> | <b>12/17/19 9:56:00 AM</b> |
| Font: 10 pt, Complex Script Font: Times New Roman, 10 pt |                              |                            |
| <b>Page 24: [192] Formatted</b>                          | <b>Microsoft Office User</b> | <b>12/17/19 9:56:00 AM</b> |
| Font: 10 pt, Complex Script Font: Times New Roman, 10 pt |                              |                            |
| <b>Page 24: [193] Formatted</b>                          | <b>Microsoft Office User</b> | <b>12/17/19 9:56:00 AM</b> |
| Font: 10 pt, Complex Script Font: Times New Roman, 10 pt |                              |                            |
| <b>Page 24: [194] Formatted</b>                          | <b>Microsoft Office User</b> | <b>12/17/19 9:56:00 AM</b> |
| Font: 10 pt, Complex Script Font: Times New Roman, 10 pt |                              |                            |
| <b>Page 24: [195] Formatted</b>                          | <b>Microsoft Office User</b> | <b>12/17/19 9:56:00 AM</b> |
| Font: 10 pt, Complex Script Font: Times New Roman, 10 pt |                              |                            |
| <b>Page 24: [196] Deleted</b>                            | <b>Microsoft Office User</b> | <b>12/17/19 2:34:00 PM</b> |

thickness

|                                                          |                              |                            |
|----------------------------------------------------------|------------------------------|----------------------------|
| <b>Page 24: [196] Deleted</b>                            | <b>Microsoft Office User</b> | <b>12/17/19 2:34:00 PM</b> |
| thickness                                                |                              |                            |
| <b>Page 24: [197] Formatted</b>                          | <b>Microsoft Office User</b> | <b>12/17/19 9:56:00 AM</b> |
| Font: 10 pt, Complex Script Font: Times New Roman, 10 pt |                              |                            |
| <b>Page 24: [198] Formatted</b>                          | <b>Microsoft Office User</b> | <b>12/17/19 9:56:00 AM</b> |
| Font: 10 pt, Complex Script Font: Times New Roman, 10 pt |                              |                            |
| <b>Page 24: [199] Formatted</b>                          | <b>Microsoft Office User</b> | <b>12/17/19 9:56:00 AM</b> |
| Font: 10 pt, Complex Script Font: Times New Roman, 10 pt |                              |                            |
| <b>Page 24: [200] Formatted</b>                          | <b>Microsoft Office User</b> | <b>12/17/19 9:56:00 AM</b> |
| Font: 10 pt, Complex Script Font: Times New Roman, 10 pt |                              |                            |
| <b>Page 24: [201] Formatted</b>                          | <b>Microsoft Office User</b> | <b>12/17/19 9:56:00 AM</b> |
| Font: 10 pt, Complex Script Font: Times New Roman, 10 pt |                              |                            |
| <b>Page 24: [202] Formatted</b>                          | <b>Microsoft Office User</b> | <b>12/17/19 9:56:00 AM</b> |
| Font: 10 pt, Complex Script Font: Times New Roman, 10 pt |                              |                            |
| <b>Page 24: [203] Formatted</b>                          | <b>Microsoft Office User</b> | <b>12/17/19 9:56:00 AM</b> |
| Font: 10 pt, Complex Script Font: Times New Roman, 10 pt |                              |                            |
| <b>Page 24: [204] Formatted</b>                          | <b>Microsoft Office User</b> | <b>12/17/19 9:56:00 AM</b> |
| Font: 10 pt, Complex Script Font: Times New Roman, 10 pt |                              |                            |
| <b>Page 24: [205] Formatted</b>                          | <b>Microsoft Office User</b> | <b>12/17/19 9:56:00 AM</b> |
| Font: 10 pt, Complex Script Font: Times New Roman, 10 pt |                              |                            |
| <b>Page 24: [206] Formatted</b>                          | <b>Microsoft Office User</b> | <b>12/17/19 9:56:00 AM</b> |
| Font: 10 pt, Complex Script Font: Times New Roman, 10 pt |                              |                            |
| <b>Page 24: [207] Formatted</b>                          | <b>Microsoft Office User</b> | <b>12/17/19 9:56:00 AM</b> |
| Font: 10 pt, Complex Script Font: Times New Roman, 10 pt |                              |                            |
| <b>Page 24: [208] Formatted</b>                          | <b>Microsoft Office User</b> | <b>12/17/19 9:56:00 AM</b> |
| Font: 10 pt, Complex Script Font: Times New Roman, 10 pt |                              |                            |
| <b>Page 24: [209] Formatted</b>                          | <b>Microsoft Office User</b> | <b>12/17/19 9:56:00 AM</b> |
| Font: 10 pt, Complex Script Font: Times New Roman, 10 pt |                              |                            |
| <b>Page 24: [210] Formatted</b>                          | <b>Microsoft Office User</b> | <b>12/17/19 9:56:00 AM</b> |
| Font: 10 pt, Complex Script Font: Times New Roman, 10 pt |                              |                            |
| <b>Page 24: [211] Formatted</b>                          | <b>Microsoft Office User</b> | <b>12/17/19 9:56:00 AM</b> |

Font: 10 pt, Complex Script Font: Times New Roman, 10 pt

**Page 24: [212] Formatted** **Microsoft Office User** **12/17/19 9:56:00 AM**

Font: 10 pt, Complex Script Font: Times New Roman, 10 pt

**Page 26: [213] Formatted** **Jeff Key** **12/17/19 6:59:00 AM**

Font: 9 pt, Bold, Complex Script Font: 9 pt, Not Bold

**Page 26: [214] Formatted** **YINGHUI LIU** **12/12/19 5:49:00 PM**

Font: 9 pt, Complex Script Font: 9 pt

**Page 26: [215] Formatted** **YINGHUI LIU** **12/12/19 5:49:00 PM**

Font: 9 pt, Complex Script Font: 9 pt

**Page 26: [216] Formatted** **Microsoft Office User** **12/17/19 9:56:00 AM**

Font: (Default) +Body (Times New Roman), 10 pt, Not Bold, Complex Script Font: +Body (Times New Roman), 10 pt

**Page 26: [217] Formatted Table** **Jeff Key** **12/17/19 6:58:00 AM**

Formatted Table

**Page 26: [218] Formatted** **Microsoft Office User** **12/17/19 9:56:00 AM**

Font: (Default) +Body (Times New Roman), Complex Script Font: +Body (Times New Roman), 10 pt

**Page 26: [218] Formatted** **Microsoft Office User** **12/17/19 9:56:00 AM**

Font: (Default) +Body (Times New Roman), Complex Script Font: +Body (Times New Roman), 10 pt

**Page 26: [219] Formatted** **Microsoft Office User** **12/17/19 9:56:00 AM**

Font: (Default) +Body (Times New Roman), Complex Script Font: +Body (Times New Roman), 10 pt

**Page 26: [220] Formatted** **Microsoft Office User** **12/17/19 9:56:00 AM**

Font: (Default) +Body (Times New Roman), Complex Script Font: +Body (Times New Roman), 10 pt

**Page 26: [220] Formatted** **Microsoft Office User** **12/17/19 9:56:00 AM**

Font: (Default) +Body (Times New Roman), Complex Script Font: +Body (Times New Roman), 10 pt

**Page 26: [221] Formatted** **Microsoft Office User** **12/17/19 9:56:00 AM**

Font: (Default) +Body (Times New Roman), Complex Script Font: +Body (Times New Roman), 10 pt

**Page 26: [221] Formatted** **Microsoft Office User** **12/17/19 9:56:00 AM**

Font: (Default) +Body (Times New Roman), Complex Script Font: +Body (Times New Roman), 10 pt

**Page 26: [222] Formatted** **Microsoft Office User** **12/17/19 9:56:00 AM**

Font: (Default) +Body (Times New Roman), Complex Script Font: +Body (Times New Roman), 10 pt

**Page 26: [222] Formatted** **Microsoft Office User** **12/17/19 9:56:00 AM**

Font: (Default) +Body (Times New Roman), Complex Script Font: +Body (Times New Roman), 10 pt

















**Page 49: [280] Formatted** **Microsoft Office User** **12/17/19 2:39:00 PM**

Font: (Default) +Body (Times New Roman), Complex Script Font: +Body (Times New Roman), 10 pt

**Page 49: [280] Formatted** **Microsoft Office User** **12/17/19 2:39:00 PM**

Font: (Default) +Body (Times New Roman), Complex Script Font: +Body (Times New Roman), 10 pt

**Page 49: [281] Formatted** **Microsoft Office User** **12/17/19 2:39:00 PM**

Font: (Default) +Body (Times New Roman), Complex Script Font: +Body (Times New Roman), 10 pt

**Page 49: [281] Formatted** **Microsoft Office User** **12/17/19 2:39:00 PM**

Font: (Default) +Body (Times New Roman), Complex Script Font: +Body (Times New Roman), 10 pt
